# Supplementary material
Source: Research Square preprint supplement (doi:10.21203/rs.3.rs-9817213/v1)
Supplement: Supplementary file 1 [file 6459bf972799234f2bb310a8.docx]

**Supplementary Materials for**

**Development and psychometric validation of the Fresco Experience Scale: a multidimensional measure of sacred-image engagement**

# Content:

## Tables:

**Table S1a.** Retention by Screening Criteria (Primary and Sensitivity Sets)

**Table S1b-S1f.** Cross-tabulations of retained vs. excluded participants by demographics

**Table S2.** Item composition of the FES-30 and FES-24 short forms by factor

**Table S3.** Reliability and Convergent Validity for the FES, FES-30, and FES-24 (N = 778)

**Table S4a-S4b.** Item-level descriptive statistics for the FES core and reserve items

**Table S5.** Ceiling and Floor by subscale using sum-based thresholds (N = 778)

**Table S6.** Descriptive Statistics and Reliability for external measures (N = 778)

**Table S7.** Standardized Factor Loadings and Significance for FES Items by Latent Factor

**Table S8.** Latent factor correlations (STDYX) for the six-factor CFA (N = 778)

**Table S9.** Discriminant Validity Diagnostics for Key FES Factor Pairs (N = 778)

**Table S10a-S10f.** (Full sample vs Orthodox-only) Correlations of FES factors with external variables (95% CIs; Holm-adjusted p within factor).

**Table S11.** (Orthodox vs Non-Orthodox) Group differences in correlations (Δr, Fisher z, Holm-adjusted p)

## Appendices:

**Appendix S1.** Fresco Experience Scale (FES) and Additional Items (n = 42)

**Appendix S2.** FESScale Development

**Appendix S3**. External measures

**Appendix S4.** Sensitivity analyses for invariance (parameterisation, category collapsing, decision rules, nearby partial-metric specs)

**Appendix S5.** Mplus Syntax for Competing Measurement Models

*Model A:* One-factor CFA

*Model B:* Six correlated first-order factors

*Model C:* Higher-order model

**Appendix S6.** Mplus Syntax for Short-Form Model Comparison

*FES six-factor CFA (see Appendix S1, Model B)*

*FES-30 CFA*

*FES-24 CFA*

**Appendix S7**. Mplus Invariance Syntax (A1, A2 and A3) for Gender and Religious Affiliation.

*Gender*: Model A1 – Configural, Model A2 – Metric, Model A3 – Scalar

*Religious Affiliation*: Model A1 – Configural, Model A2 – Metric, Model A3 – Scalar

**Appendix S8**. lavaan syntax / outputs summary (robustness check).

**Supplementary Dataset**

**Reference**

# Table S1a. Retention by Screening Criteria (Primary and Sensitivity Sets)

| Criterion set | Attention threshold | Longstring threshold | Passed attention, n (%) | Passed longstring, n (%) | Passed both, n (%) | Retained N / 941 |
| --- | --- | --- | --- | --- | --- | --- |
| Primary (reported in main text) | ≥5/8 correct | < 12 | 917 (97.4%) | 794  (84.4%) | 778 (82.7%) | 778 |
| Secondary (Supplementary) | ≥4/8 correct | < 14 | 941  (100%) | 825 (87.7%) | 825 (87.7%) | 825 |

*Note.* Percentages are relative to the full sample *N* = 941. "Passed Both" represents the intersection of the two conditions. Longstring refers to the maximum number of consecutive identical responses across all 42 administered items.

# Table S1b. Cross-tabulations of retained vs. excluded participants by gender

| Status | Screening rule | Male | Female | Total |
| --- | --- | --- | --- | --- |
| Excluded | Primary | 35 (21.5%) | 128 (78.5%) | 163 |
| Retained | 166 (21.3%) | 612 (87.7%) | 778 |
| Excluded | Secondary | 26 (22.4%) | 90 (77.6%) | 116 |
| Retained | 175 (21.2%) | 650 (78.8%) | 825 |

*Note.* Primary (≥5/8 correct attention checks and FES longstring < 12) and Secondary screening criteria (≥4/8 correct attention checks and FES longstring < 14). Percentages are row percentages.

# Table S1c. Cross-tabulations of retained vs. excluded participants by education level

| Status | Screening rule | Primary | Secondary | Vocational | Undergraduate | Master’s | Doctoral | Total |
| --- | --- | --- | --- | --- | --- | --- | --- | --- |
| Excluded | Primary | / | 61 (37.4%) | 4 (2.5%) | 73 (44.8%) | 23 (14.1%) | 2 (1.2%) | 163 |
| Retained | 1 (0.1%) | 220 (28.3%) | 8 (1.0%) | 420 (54.0%) | 107 (13.8%) | 22 (2.8%) | 778 |
| Excluded | Secondary | / | 41 (35.3%) | 2 (1.7%) | 50 (43.1%) | 21 (18.1%) | 2 (1.7%) | 116 |
| Retained | 1 (0.1%) | 240 (29.1%) | 10 (1.2%) | 443 (53.7%) | 109 (13.2%) | 22 (2.7%) | 825 |

*Note.* Primary (≥5/8 correct attention checks and FES longstring < 12) and Secondary screening criteria (≥4/8 correct attention checks and FES longstring < 14). Percentages are row percentages.

# Table S1d. Cross-tabulations of retained vs. excluded participants by religious affiliation

| Status | Screening rule | Orthodox | Muslim | Catholic | Jewish | Atheist/Agnostic | Other | Prefer not to say | Total |
| --- | --- | --- | --- | --- | --- | --- | --- | --- | --- |
| Excluded | Primary | 126 (77.3%) | 34 (20.9%) | 1 (0.6%) | 1 (0.6%) | 1 (0.6%) | / | / | 163 |
| Retained | 592 (76.1%) | 155 (19.9%) | 1 (0.1%) | 2 (0.3%) | 17 (2.2%) | 3 (0.4%) | 8 (1.0%) | 778 |
| Excluded | Secondary | 90 (77.6%) | 25 (21.6%) | / | / | 1 (0.9%) | / | / | 116 |
| Retained | 628 (76.1%) | 164 (19.9%) | 2 (0.2%) | 3 (0.4%) | 17 (2.1%) | 3 (0.4%) | 8 (1.0%) | 825 |

*Note.* Primary (≥5/8 correct attention checks and FES longstring < 12) and Secondary screening criteria (≥4/8 correct attention checks and FES longstring < 14). Percentages are row percentages.

# Table S1e. Cross-tabulations of retained vs. excluded participants by ethnic affiliation

| Status | Screening rule | Serb | Bosniak | Roma | Other | Prefer not to say | Total (valid) |
| --- | --- | --- | --- | --- | --- | --- | --- |
| Excluded | Primary | 128 (78.5%) | 30 (18.4%) | 1 (1.2%) | / | 3 (1.8%) | 163 |
| Retained | 612 (78.7%) | 137 (17.6%) | 1 (0.1%) | 12 (1.5%) | 12 (1.5%) | 774 |
| Excluded | Secondary | 91 (78.4%) | 22 (19.0%) | 1 (0.9%) | / | 2 (1.7%) | 116 |
| Retained | 649 (79.0%) | 145 (17.7%) | 2 (0.2%) | 12 (1.5%) | 13 (1.6%) | 821 |

*Note.* Primary (≥5/8 correct attention checks and FES longstring < 12) and Secondary screening criteria (≥4/8 correct attention checks and FES longstring < 14). Percentages are row percentages.

# Table S1f. Cross-tabulations of retained vs. excluded participants by age

| Status | Screening rule | N | Min–Max | M | SD |
| --- | --- | --- | --- | --- | --- |
| Excluded | Primary | 163 | 18–73 | 28.48 | 12.05 |
| Retained | 778 | 18–66 | 27.97 | 11.63 |
| Excluded | Secondary | 116 | 18–69 | 28.59 | 11.28 |
| Retained | 825 | 18–73 | 27.98 | 11.76 |

*Note.* Primary (≥5/8 correct attention checks and FES longstring < 12) and Secondary screening criteria (≥4/8 correct attention checks and FES longstring < 14). Percentages are row percentages.

# Table S2. Item composition of the FES-30 and FES-24 short forms by factor

| Factor | FES-30 retained items (5 per factor) | Dropped from FES → FES-30 (brief rationale) | FES-24 retained items (4 per factor) |
| --- | --- | --- | --- |
| Visual–Aesthetic | FES_01, FES_02, FES_03, FES_04, FES_05 | Dropped FES_06 (lowest loading; content coverage retained) | FES_01, FES_02, FES_03, FES_04 |
| Emotional | FES_07, FES_09, FES_10, FES_11, FES_12 | Dropped FES_08 (conceptually less central; relatively more cognitive) | FES_07, FES_09, FES_10, FES_12 |
| Cognitive | FES_13, FES_14, FES_15, FES_17, FES_18 | Dropped FES_16 (lowest loading; content coverage retained) | FES_13, FES_14, FES_17, FES_18 |
| Communicative | FES_20, FES_21, FES_22, FES_23, FES_24 | Dropped FES_19 (lowest loading; core content retained) | FES_20, FES_21, FES_22, FES_23 |
| Spiritual–Transformative | FES_25, FES_26, FES_27, FES_28, FES_29 | Dropped FES_30 (content overlap; redundancy reduction) | FES_25, FES_27, FES_28, FES_29 |
| Sociocultural | FES_31, FES_32, FES_33, FES_35, FES_36 | Dropped FES_34 (lower loading; content coverage retained) | FES_32, FES_33, FES_35, FES_36 |

*Note.* Item selection prioritised higher standardised loadings within factor, avoidance of near-duplicate content, and preservation of each factor’s core content domain. Where candidates were comparable, distributional properties (e.g., ceiling concentration and category use) served as a tie-breaker.

# Table S3. Reliability and Convergent Validity for the FES, FES-30, and FES-24 (*N* = 778)

| Form | Factor | *ω* [95% CI] | *α* [95% CI] | AVE | CR |
| --- | --- | --- | --- | --- | --- |
| FES | Visual–Aesthetic | .88 [.87, .89] | .88 [.86, .89] | .64 | .91 |
|  | Emotional | .94 [.93, .94] | .94 [.93, .94] | .73 | .94 |
|  | Cognitive | .89 [.87, .90] | .88 [.87, .89] | .59 | .90 |
|  | Communicative | .90 [.89, .91] | .90 [.89, .91] | .68 | .93 |
|  | Spiritual–Transformative | .96 [.95, .96] | .95 [.95, .96] | .78 | .96 |
|  | Sociocultural | .91 [.90, .92] | .91 [.90, .92] | .71 | .94 |
| FES-30 | Visual–Aesthetic | .88 [.86, .89] | .87 [.86, .88] | .67 | .91 |
|  | Emotional | .93 [.92, .93] | .93 [.92, .93] | .74 | .93 |
|  | Cognitive | .87 [.85, .88] | .86 [.85, .88] | .59 | .88 |
|  | Communicative | .89 [.88, .90] | .89 [.88, .90] | .69 | .92 |
|  | Spiritual–Transformative | .95 [.95, .96] | .95 [.95, .96] | .80 | .95 |
|  | Sociocultural | .91 [.90, .92] | .91 [.90, .92] | .74 | .93 |
| FES-24 | Visual–Aesthetic | .87 [.86, .89] | .86 [.85, .88] | .69 | .90 |
|  | Emotional | .92 [.91, .93] | .92 [.91, .93] | .76 | .93 |
|  | Cognitive | .83 [.81, .85] | .82 [.80, .84] | .56 | .84 |
|  | Communicative | .89 [.88, .90] | .89 [.88, .90] | .72 | .91 |
|  | Spiritual–Transformative | .94 [.94, .95] | .94 [.93, .95] | .81 | .94 |
|  | Sociocultural | .91 [.90, .92] | .91 [.90, .92] | .79 | .94 |

*Note.* N = 778. *ω* = McDonald’s omega; *α* = Cronbach’s alpha; CI = confidence interval; AVE = average variance extracted; CR = composite reliability.

# Table S4a. Item-level descriptive statistics for the FES core items

| Item | Factor | N_total | Mean | SD | Floor_pct | Ceiling_pct | Empty_cats | Count_1 | Count_2 | Count_3 | Count_4 | Count_5 | Count_6 | Count_7 |
| --- | --- | --- | --- | --- | --- | --- | --- | --- | --- | --- | --- | --- | --- | --- |
| FES_01 | Visual-Aesthetic | 778 | 5.562 | 1.658 | 4.0 | 38.3 | 0 | 31 | 24 | 51 | 67 | 101 | 206 | 298 |
| FES_02 | Visual-Aesthetic | 778 | 5.36 | 1.672 | 4.1 | 29.0 | 0 | 32 | 37 | 52 | 72 | 116 | 243 | 226 |
| FES_03 | Visual-Aesthetic | 778 | 5.87 | 1.368 | 1.3 | 41.9 | 0 | 10 | 18 | 38 | 35 | 121 | 230 | 326 |
| FES_04 | Visual-Aesthetic | 778 | 6.156 | 1.294 | 1.3 | 56.2 | 0 | 10 | 15 | 20 | 33 | 80 | 183 | 437 |
| FES_05 | Visual-Aesthetic | 778 | 6.26 | 1.138 | 0.1 | 58.1 | 0 | 1 | 11 | 22 | 36 | 63 | 193 | 452 |
| FES_06 | Visual-Aesthetic | 778 | 6.126 | 1.219 | 0.6 | 50.6 | 0 | 5 | 13 | 25 | 35 | 74 | 232 | 394 |
| FES_07 | Emotional | 778 | 5.229 | 1.899 | 6.9 | 33.3 | 0 | 54 | 48 | 62 | 60 | 91 | 204 | 259 |
| FES_08 | Emotional | 778 | 4.635 | 1.823 | 8.5 | 13.5 | 0 | 66 | 66 | 72 | 108 | 141 | 220 | 105 |
| FES_09 | Emotional | 778 | 4.748 | 1.864 | 8.7 | 16.7 | 0 | 68 | 65 | 62 | 86 | 146 | 221 | 130 |
| FES_10 | Emotional | 778 | 4.623 | 1.904 | 10.8 | 15.3 | 0 | 84 | 60 | 65 | 96 | 143 | 211 | 119 |
| FES_11 | Emotional | 778 | 5.026 | 1.77 | 5.1 | 21.2 | 0 | 40 | 56 | 82 | 61 | 131 | 243 | 165 |
| FES_12 | Emotional | 778 | 5.063 | 1.822 | 6.4 | 24.8 | 0 | 50 | 50 | 65 | 79 | 119 | 222 | 193 |
| FES_13 | Cognitive | 778 | 5.638 | 1.563 | 3.0 | 36.9 | 0 | 23 | 26 | 46 | 48 | 116 | 232 | 287 |
| FES_14 | Cognitive | 778 | 4.787 | 1.813 | 7.3 | 17.2 | 0 | 57 | 64 | 62 | 103 | 145 | 213 | 134 |
| FES_15 | Cognitive | 778 | 4.697 | 1.776 | 6.4 | 16.2 | 0 | 50 | 65 | 94 | 81 | 186 | 176 | 126 |
| FES_16 | Cognitive | 778 | 4.991 | 1.783 | 5.0 | 21.7 | 0 | 39 | 62 | 78 | 73 | 131 | 226 | 169 |
| FES_17 | Cognitive | 778 | 5.014 | 1.742 | 5.3 | 20.6 | 0 | 41 | 58 | 57 | 84 | 151 | 227 | 160 |
| FES_18 | Cognitive | 778 | 4.483 | 1.905 | 11.8 | 14.0 | 0 | 92 | 65 | 65 | 101 | 172 | 174 | 109 |
| FES_19 | Communicative | 778 | 5.608 | 1.502 | 2.2 | 35.0 | 0 | 17 | 26 | 34 | 84 | 118 | 227 | 272 |
| FES_20 | Communicative | 778 | 5.835 | 1.514 | 3.0 | 44.9 | 0 | 23 | 21 | 28 | 48 | 98 | 211 | 349 |
| FES_21 | Communicative | 778 | 5.792 | 1.481 | 2.2 | 43.1 | 0 | 17 | 22 | 27 | 70 | 103 | 204 | 335 |
| FES_22 | Communicative | 778 | 5.131 | 1.68 | 4.9 | 22.6 | 0 | 38 | 47 | 37 | 103 | 157 | 220 | 176 |
| FES_23 | Communicative | 778 | 5.743 | 1.472 | 2.8 | 37.1 | 0 | 22 | 23 | 25 | 46 | 120 | 253 | 289 |
| FES_24 | Communicative | 778 | 4.788 | 1.914 | 10.8 | 20.2 | 0 | 84 | 47 | 50 | 94 | 154 | 192 | 157 |
| FES_25 | Spiritual-Transformative | 778 | 4.905 | 1.788 | 8.0 | 17.9 | 0 | 62 | 50 | 40 | 104 | 153 | 230 | 139 |
| FES_26 | Spiritual-Transformative | 778 | 4.805 | 1.916 | 11.8 | 17.9 | 0 | 92 | 39 | 44 | 92 | 137 | 235 | 139 |
| FES_27 | Spiritual-Transformative | 778 | 5.006 | 1.934 | 10.9 | 23.8 | 0 | 85 | 34 | 46 | 73 | 113 | 242 | 185 |
| FES_28 | Spiritual-Transformative | 778 | 4.888 | 1.924 | 11.7 | 20.8 | 0 | 91 | 36 | 37 | 88 | 141 | 223 | 162 |
| FES_29 | Spiritual-Transformative | 778 | 4.683 | 1.983 | 13.0 | 18.6 | 0 | 101 | 50 | 50 | 85 | 145 | 202 | 145 |
| FES_30 | Spiritual-Transformative | 778 | 4.351 | 1.842 | 11.3 | 9.6 | 0 | 88 | 75 | 70 | 120 | 168 | 182 | 75 |
| FES_31 | Sociocultural | 778 | 5.663 | 1.521 | 2.3 | 36.6 | 0 | 18 | 29 | 39 | 56 | 112 | 239 | 285 |
| FES_32 | Sociocultural | 778 | 5.848 | 1.675 | 4.1 | 53.6 | 0 | 32 | 24 | 36 | 51 | 69 | 149 | 417 |
| FES_33 | Sociocultural | 778 | 6.064 | 1.449 | 2.2 | 56.2 | 0 | 17 | 23 | 16 | 49 | 64 | 172 | 437 |
| FES_34 | Sociocultural | 778 | 5.816 | 1.472 | 2.3 | 43.1 | 0 | 18 | 18 | 32 | 64 | 92 | 219 | 335 |
| FES_35 | Sociocultural | 778 | 5.976 | 1.472 | 2.3 | 51.2 | 0 | 18 | 23 | 25 | 42 | 76 | 196 | 398 |
| FES_36 | Sociocultural | 778 | 6.226 | 1.436 | 2.7 | 66.6 | 0 | 21 | 15 | 20 | 31 | 55 | 118 | 518 |

***Note*.** N_*total* = number of respondents with a valid response for the item. Mean and SD are computed on the 1–7 response metric for descriptive purposes. Floor_pct and Ceiling_pct = percentage of responses in the lowest (1) and highest (7) category, respectively. Empty_cats = number of response categories (from 1 to 7) with zero observed responses for that item. Count_1–Count_7 = observed frequencies in each response category (1–7). Items are grouped by their assigned FES factor.

# Table S4b. Item-level descriptive statistics for the FES reserve items

| Item | Factor | N_total | Mean | SD | Floor_pct | Ceiling_pct | Empty_cats | Count_1 | Count_2 | Count_3 | Count_4 | Count_5 | Count_6 | Count_7 |
| --- | --- | --- | --- | --- | --- | --- | --- | --- | --- | --- | --- | --- | --- | --- |
| FES_37 | Visual-Aesthetic | 778 | 5.602 | 1.633 | 4.4 | 37.7 | 0 | 34 | 21 | 40 | 64 | 101 | 225 | 293 |
| FES_38 | Emotional | 778 | 5.387 | 1.839 | 5.9 | 37.8 | 0 | 46 | 43 | 47 | 68 | 92 | 188 | 294 |
| FES_39 | Cognitive | 778 | 4.835 | 1.769 | 7.8 | 17.2 | 0 | 61 | 45 | 58 | 102 | 177 | 201 | 134 |
| FES_40 | Communicative | 778 | 5.632 | 1.538 | 2.4 | 36.6 | 0 | 19 | 31 | 34 | 65 | 120 | 224 | 285 |
| FES_41 | Spiritual-Transformative | 778 | 5.06 | 1.89 | 9.0 | 26.1 | 0 | 70 | 41 | 45 | 82 | 121 | 216 | 203 |
| FES_42 | Sociocultural | 778 | 5.721 | 1.757 | 4.5 | 49.7 | 0 | 35 | 40 | 32 | 48 | 77 | 159 | 387 |

***Note*.** N_total = number of respondents with a valid response for the item. Mean and SD are computed on the 1–7 response metric for descriptive purposes. Floor_pct and Ceiling_pct = percentage of responses in the lowest (1) and highest (7) category, respectively. Empty_cats = number of response categories (from 1 to 7) with zero observed responses for that item. Count_1–Count_7 = observed frequencies in each response category (1–7). Items are grouped by their assigned FES factor.

# Table S5. Subscale score distributions and floor/ceiling effects for the FES, FES-30, and FES-24 (sum-score thresholds; *N* = 778)

| Form | Factor | k | sum_floor_thr | sum_ceil_thr | floor_pct | ceiling_pct | n_complete |
| --- | --- | --- | --- | --- | --- | --- | --- |
| FES | Visual–Aesthetic | 6 | 9 | 39 | 0.0 | 42.4 | 778 |
| Emotional | 6 | 9 | 39 | 5.4 | 15.6 | 778 |
| Cognitive | 6 | 9 | 39 | 1.7 | 12.0 | 778 |
| Communicative | 6 | 9 | 39 | 1.3 | 27.1 | 778 |
| Spiritual–Transformative | 6 | 9 | 39 | 9.9 | 12.9 | 778 |
| Sociocultural | 6 | 9 | 39 | 0.5 | 50.1 | 778 |
| FES-30 | Visual–Aesthetic | 5 | 7 | 33 | 0.1 | 37.8 | 778 |
| Emotional | 5 | 7 | 33 | 4.8 | 15.0 | 778 |
| Cognitive | 5 | 7 | 33 | 2.4 | 10.3 | 778 |
| Communicative | 5 | 7 | 33 | 1.5 | 22.6 | 778 |
| Spiritual–Transformative | 5 | 7 | 33 | 9.1 | 13.5 | 778 |
| Sociocultural | 5 | 7 | 33 | 0.5 | 48.7 | 778 |
| FES-24 | Visual–Aesthetic | 4 | 6 | 26 | 0.4 | 42.3 | 778 |
| Emotional | 4 | 6 | 26 | 6.3 | 19.8 | 778 |
| Cognitive | 4 | 6 | 26 | 3.0 | 13.9 | 778 |
| Communicative | 4 | 6 | 26 | 1.5 | 35.7 | 778 |
| Spiritual–Transformative | 4 | 6 | 26 | 9.9 | 18.6 | 778 |
| Sociocultural | 4 | 6 | 26 | 1.2 | 58.5 | 778 |

***Note*.** Floor and ceiling effects were computed at the **subscale (factor) level** using **sum scores**. k = number of items in the subscale. sum_floor_thr and sum_ceil_thr = sum-score thresholds used to classify a respondent as showing a floor or ceiling effect, respectively (derived from the minimum and maximum possible subscale sums given the item response scale and the prespecified criterion for “extreme” responding; see Supplement for exact rule). floor_pct and ceiling_pct = percentage of respondents whose subscale sum met the floor or ceiling threshold. n_complete = number of participants with complete data for that subscale in the given form.

# Table S6. Descriptive Statistics and Reliability for external measures (*N* = 778)

|  | Valid | Missing | Mean | Std. Deviation | α [95% CI] | ω [95% CI] | Observed range | Possible range |
| --- | --- | --- | --- | --- | --- | --- | --- | --- |
| Religiosity | 778 | 0 | 0.00 | 0.66 | .884 [.871 - .895] | .886 [.874 - .898] | -2.29 – 1.43 | Standardised z |
| NAIT | 774 | 4 | 3.46 | 0.53 | .855 [.841 - .869] | .858 [.840 - .874] | 1.67 – 5 | 1 – 5 |
| AEQ | 778 | 0 | 4.95 | 1.07 | .945 [.939 - .950] | .945 [.939 - .950] | 1.5 – 7 | 1 – 7 |
| DSES | 778 | 0 | 4.39 | 1.21 | .963 [.960 - .967] | .967 [.964 - .970] | 1.13 – 5.88 | 1 – 6 |
| Extraversion | 778 | 0 | 3.43 | 0.65 | .704 [.672 - .733] | .714 [.684 - .744] | 1.63 – 5 | 1 – 5 |
| Neuroticism | 778 | 0 | 2.87 | 0.72 | .751 [.723 - .776] | .742 [.714 - .769] | 1 – 5 | 1 – 5 |
| Narcissism | 778 | 0 | 2.88 | 0.66 | .659 [.622 - .693] | .658 [.623 - .693] | 1.11– 5 | 1 – 5 |
| NFCS-15 | 778 | 0 | 4.38 | 0.90 | .871 [.857 - .884] | .873 [.860 - .886] | 1.6 – 6 | 1 – 6 |

*Note.* NAIT = National Identity Scale; AEQ = Aesthetic Experience Questionnaire; DSES = Daily Spiritual Experience Scale; NFCS-15 = Need for Closure Scale; AVE = Average Variance Extracted; CR = Composite Reliability. Religiosity items were standardised into z-scores prior to aggregation due to non-identical response formats; the composite score reflects the mean of these standardised values.

# Table S7. Standardized Factor Loadings and Significance for FES Items by Latent Factor (*N*=778)

| **Item** | **Estimate** | **S.E.** | **z** | **p** |
| --- | --- | --- | --- | --- |
| **Visual–Aesthetic** | | | | |
| FES_01 | 0.859 | 0.016 | 55.161 | <.001 |
| FES_02 | 0.872 | 0.015 | 58.838 | <.001 |
| FES_03 | 0.764 | 0.021 | 36.296 | <.001 |
| FES_04 | 0.876 | 0.017 | 50.884 | <.001 |
| FES_05 | 0.722 | 0.024 | 30.007 | <.001 |
| FES_06 | 0.667 | 0.027 | 24.474 | <.001 |
| **Emotional** |  |  |  |  |
| FES_07 | 0.894 | 0.010 | 89.983 | <.001 |
| FES_08 | 0.820 | 0.012 | 66.261 | <.001 |
| FES_09 | 0.866 | 0.010 | 82.808 | <.001 |
| FES_10 | 0.874 | 0.010 | 88.26 | <.001 |
| FES_11 | 0.814 | 0.016 | 52.216 | <.001 |
| FES_12 | 0.864 | 0.012 | 72.978 | <.001 |
| Cognitive |  |  |  |  |
| FES_13 | 0.731 | 0.024 | 30.909 | <.001 |
| FES_14 | 0.761 | 0.019 | 40.428 | <.001 |
| FES_15 | 0.743 | 0.018 | 41.458 | <.001 |
| FES_16 | 0.679 | 0.020 | 33.434 | <.001 |
| FES_17 | 0.809 | 0.015 | 53.345 | <.001 |
| FES_18 | 0.879 | 0.015 | 58.73 | <.001 |
| **Communicative** | | | |  |
| FES_19 | 0.777 | 0.018 | 42.893 | <.001 |
| FES_20 | 0.851 | 0.014 | 59.599 | <.001 |
| FES_21 | 0.834 | 0.015 | 54.418 | <.001 |
| FES_22 | 0.819 | 0.015 | 54.447 | <.001 |
| FES_23 | 0.806 | 0.016 | 49.681 | <.001 |
| FES_24 | 0.842 | 0.016 | 52.599 | <.001 |
| **Spiritual–Transformative** | | | |  |
| FES_25 | 0.830 | 0.014 | 61.112 | <.001 |
| FES_26 | 0.858 | 0.011 | 75.329 | <.001 |
| FES_27 | 0.921 | 0.007 | 127.335 | <.001 |
| FES_28 | 0.925 | 0.007 | 135.955 | <.001 |
| FES_29 | 0.914 | 0.007 | 123.493 | <.001 |
| FES_30 | 0.840 | 0.012 | 69.183 | <.001 |
| **Sociocultural** |  |  |  |  |
| FES_31 | 0.751 | 0.020 | 38.513 | <.001 |
| FES_32 | 0.899 | 0.013 | 67.251 | <.001 |
| FES_33 | 0.892 | 0.014 | 64.362 | <.001 |
| FES_34 | 0.721 | 0.022 | 33.228 | <.001 |
| FES_35 | 0.858 | 0.014 | 59.828 | <.001 |
| FES_36 | 0.907 | 0.015 | 59.595 | <.001 |

*Note*. All loadings are standardized. The column z represents the test statistic (Estimate / S.E.). All p-values are two-tailed and reported as < .001).

# Table S8. Latent factor correlations (STDYX) for the six-factor CFA (*N* = 778)

|  | Visual–Aesthetic | Emotional | Cognitive | Communicative | Spiritual–Transformative | Sociocultural |
| --- | --- | --- | --- | --- | --- | --- |
| Visual–Aesthetic | 1.000 | .776 | .644 | .747 | .687 | .792 |
| Emotional | .776 | 1.000 | .695 | .754 | .894 | .682 |
| Cognitive | .644 | .695 | 1.000 | .798 | .733 | .630 |
| Communicative | .747 | .754 | .798 | 1.000 | .755 | .747 |
| Spiritual–Transformative | .687 | .894 | .733 | .755 | 1.000 | .662 |
| Sociocultural | .792 | .682 | .630 | .747 | .662 | 1.000 |

# Table S9. Discriminant Validity Diagnostics for Key FES Factor Pairs (*N* = 778)

| Factor pair | *r* (latent) | *r²* | AVE  (Factor 1) | AVE  (Factor 2) | Fornell–Larcker met?  (r² ≤ AVE for both) | HTMT |
| --- | --- | --- | --- | --- | --- | --- |
| Emotional – Spiritual–Transformative | .894 | .800 | .732 | .778 | No (exceeds both AVEs) | .902 |
| Cognitive – Communicative | .798 | .637 | .592 | .675 | Partial (exceeds Cognitive AVE only) | .804 |

Note. *r* = standardised latent factor correlation from the six-factor CFA (STDYX). r² = squared correlation. AVE = average variance extracted for each factor (Table 3). HTMT = heterotrait–monotrait ratio computed from polychoric item correlations for ordered indicators.

# Table S10a. Correlations of the Visual–Aesthetic Factor with External Variables (Full Sample vs. Orthodox Subsample)

| Variable | *r* (All) [95% CI] | *p* (All) | *pHolm*​ (All) | *N* (All) | *r* (Orth) [95% CI] | *p* (Orth) | *pHolm​* (Orth) | *N* (Orth) |
| --- | --- | --- | --- | --- | --- | --- | --- | --- |
| Gender | .08 [.01, .15] | .033 | .134 | 778 | .08 [–.00, .16] | .058 | .174 | 592 |
| Age | .01 [–.06, .09] | .690 | .690 | 778 | .01 [–.08, .09] | .903 | .903 | 592 |
| Education level | .17 [.10, .24] | < .001 | < .001 | 778 | .15 [.07, .23] | < .001 | .001 | 592 |
| Religiosity | .13 [.06, .19] | < .001 | .004 | 778 | .26 [.19, .34] | < .001 | < .001 | 588 |
| NAIT | .25 [.18, .31] | < .001 | < .001 | 774 | .35 [.28, .42] | < .001 | < .001 | 592 |
| AEQ Total | .33 [.26, .39] | < .001 | < .001 | 778 | .17 [.09, .24] | < .001 | < .001 | 592 |
| DSES | .11 [.04, .18] | .003 | .014 | 778 | .15 [.07, .22] | < .001 | .002 | 592 |
| Extraversion | .11 [.04, .18] | .002 | .009 | 778 | –.13 [–.21, –.05] | .001 | .004 | 592 |
| Neuroticism | –.08 [–.15, –.01] | .038 | .134 | 778 | –.05 [–.13, .04] | .264 | .528 | 592 |
| Narcissism | –.05 [–.12, .02] | .192 | .384 | 778 | .21 [.14, .29] | < .001 | < .001 | 592 |
| NFCS-15 | .12 [.05, .19] | .001 | .005 | 778 | .21 [.14, .29] | < .001 | < .001 | 592 |

*Note.* All = full sample; Orth = Orthodox subsample. *N* varies due to missing data for specific variables. NAIT = National Identity Scale; AEQ = Aesthetic Experience Questionnaire; DSES = Daily Spiritual Experience Scale; NFCS-15 = Need for Closure Scale. Gender was coded as 1 = Female, 2 = Male.

# Table S10b. Correlations of the Emotional Factor with External Variables (Full Sample vs. Orthodox Subsample)

| Variable | *r* (All) [95% CI] | *p* (All) | *pHolm*​ (All) | *N* (All) | *r* (Orth) [95% CI] | *p* (Orth) | *pHolm​* (Orth) | *N* (Orth) |
| --- | --- | --- | --- | --- | --- | --- | --- | --- |
| Gender | .03 [–.04, .10] | .348 | .533 | 778 | .04 [–.04, .12] | .331 | .855 | 592 |
| Age | .06 [–.01, .13] | .100 | .299 | 778 | .04 [–.04, .12] | .285 | .855 | 592 |
| Education level | .15 [.08, .22] | < .001 | < .001 | 778 | .16 [.08, .24] | < .001 | .001 | 592 |
| Religiosity | .28 [.21, .34] | < .001 | < .001 | 778 | .34 [.26, .41] | < .001 | < .001 | 588 |
| NAIT | .31 [.25, .37] | < .001 | < .001 | 774 | .40 [.33, .46] | < .001 | < .001 | 592 |
| AEQ Total | .36 [.29, .42] | < .001 | < .001 | 778 | .26 [.19, .34] | < .001 | < .001 | 592 |
| DSES | .16 [.09, .23] | < .001 | < .001 | 778 | .11 [.03, .19] | .010 | .039 | 592 |
| Extraversion | .09 [.02, .16] | .016 | .078 | 778 | –.11 [–.19, –.03] | .005 | .027 | 592 |
| Neuroticism | –.10 [–.17, –.03] | .008 | .046 | 778 | –.02 [–.10, .06] | .560 | .855 | 592 |
| Narcissism | –.04 [–.11, .03] | .266 | .533 | 778 | .21 [.13, .29] | < .001 | < .001 | 592 |
| NFCS-15 | .08 [.01, .15] | .019 | .078 | 778 | .21 [.13, .29] | < .001 | < .001 | 592 |

*Note.* All = full sample; Orth = Orthodox subsample. *N* varies due to missing data for specific variables. NAIT = National Identity Scale; AEQ = Aesthetic Experience Questionnaire; DSES = Daily Spiritual Experience Scale; NFCS-15 = Need for Closure Scale. Gender was coded as 1 = Female, 2 = Male.

# Table S10c. Correlations of the Cognitive Factor with External Variables (Full Sample vs. Orthodox Subsample)

| Variable | *r* (All) [95% CI] | *p* (All) | *pHolm*​ (All) | *N* (All) | *r* (Orth) [95% CI] | *p* (Orth) | *pHolm​* (Orth) | *N* (Orth) |
| --- | --- | --- | --- | --- | --- | --- | --- | --- |
| Gender | .06 [–.01, .13] | .118 | .472 | 778 | .05 [–.04, .13] | .274 | .974 | 592 |
| Age | –.03 [–.10, .04] | .353 | .707 | 778 | –.04 [–.12, .05] | .395 | .974 | 592 |
| Education level | .13 [.06, .20] | < .001 | .002 | 778 | .05 [–.03, .13] | .244 | .974 | 592 |
| Religiosity | .23 [.17, .30] | < .001 | < .001 | 778 | .28 [.20, .35] | < .001 | < .001 | 588 |
| NAIT | .29 [.22, .35] | < .001 | < .001 | 774 | .34 [.27, .41] | < .001 | < .001 | 592 |
| AEQ | .51 [.46, .56] | < .001 | < .001 | 778 | .51 [.45, .57] | < .001 | < .001 | 592 |
| DSES | .14 [.07, .20] | < .001 | .001 | 778 | .08 [–.00, .16] | .055 | .274 | 592 |
| Extraversion | .05 [–.02, .12] | .146 | .472 | 778 | –.14 [–.22, –.06] | .001 | .004 | 592 |
| Neuroticism | –.10 [–.17, –.03] | .005 | .031 | 778 | –.00 [–.08, .08] | .981 | .981 | 592 |
| Narcissism | –.02 [–.09, .05] | .502 | .707 | 778 | .16 [.08, .24] | < .001 | .001 | 592 |
| NFCS-15 | .09 [.02, .16] | .010 | .048 | 778 | .16 [.08, .24] | < .001 | .001 | 592 |

*Note.* All = full sample; Orth = Orthodox subsample. *N* varies due to missing data for specific variables. NAIT = National Identity Scale; AEQ = Aesthetic Experience Questionnaire; DSES = Daily Spiritual Experience Scale; NFCS-15 = Need for Closure Scale. Gender was coded as 1 = Female, 2 = Male.

# Table S10d. Correlations of the Communicative Factor with External Variables (Full Sample vs. Orthodox Subsample)

| Variable | *r* (All) [95% CI] | *p* (All) | *pHolm*​ (All) | *N* (All) | *r* (Orth) [95% CI] | *p* (Orth) | *pHolm​* (Orth) | *N* (Orth) |
| --- | --- | --- | --- | --- | --- | --- | --- | --- |
| Gender | .04 [–.03, .11] | .258 | .615 | 778 | .07 [–.01, .15] | .089 | .266 | 592 |
| Age | –.05 [–.12, .02] | .147 | .589 | 778 | –.02 [–.10, .06] | .610 | 1.000 | 592 |
| Education level | .14 [.07, .21] | < .001 | < .001 | 778 | .09 [.01, .17] | .030 | .152 | 592 |
| Religiosity | .20 [.13, .26] | < .001 | < .001 | 778 | .24 [.16, .32] | < .001 | < .001 | 588 |
| NAIT | .29 [.22, .35] | < .001 | < .001 | 774 | .35 [.28, .42] | < .001 | < .001 | 592 |
| AEQ Total | .40 [.34, .45] | < .001 | < .001 | 778 | .46 [.39, .52] | < .001 | < .001 | 592 |
| DSES | .15 [.08, .22] | < .001 | < .001 | 778 | .12 [.04, .19] | .005 | .031 | 592 |
| Extraversion | .09 [.02, .16] | .013 | .066 | 778 | –.08 [–.16, –.00] | .041 | .164 | 592 |
| Neuroticism | –.05 [–.12, .03] | .205 | .615 | 778 | –.00 [–.08, .08] | .961 | 1.000 | 592 |
| Narcissism | –.01 [–.08, .06] | .777 | .777 | 778 | .20 [.12, .28] | < .001 | < .001 | 592 |
| NFCS-15 | .15 [.08, .21] | < .001 | < .001 | 778 | .20 [.12, .28] | < .001 | < .001 | 592 |

*Note.* All = full sample; Orth = Orthodox subsample. *N* varies due to missing data for specific variables. NAIT = National Identity Scale; AEQ = Aesthetic Experience Questionnaire; DSES = Daily Spiritual Experience Scale; NFCS-15 = Need for Closure Scale. Gender was coded as 1 = Female, 2 = Male.

# Table S10e. Correlations of the Spiritual–Transformative Factor with External Variables (Full Sample vs. Orthodox Subsample)

| Variable | *r* (All) [95% CI] | *p* (All) | *pHolm*​ (All) | *N* (All) | *r* (Orth) [95% CI] | *p* (Orth) | *pHolm​* (Orth) | *N* (Orth) |
| --- | --- | --- | --- | --- | --- | --- | --- | --- |
| Gender | .04 [–.03, .11] | .237 | .474 | 778 | .04 [–.04, .12] | .296 | .889 | 592 |
| Age | .06 [–.01, .13] | .115 | .346 | 778 | .04 [–.04, .12] | .308 | .889 | 592 |
| Education level | .11 [.04, .18] | .002 | .010 | 778 | .08 [–.00, .16] | .058 | .231 | 592 |
| Religiosity | .28 [.21, .34] | < .001 | < .001 | 778 | .42 [.35, .48] | < .001 | < .001 | 588 |
| NAIT | .33 [.27, .40] | < .001 | < .001 | 774 | .41 [.34, .47] | < .001 | < .001 | 592 |
| AEQ Total | .34 [.27, .40] | < .001 | < .001 | 778 | .41 [.34, .47] | < .001 | < .001 | 592 |
| DSES | .18 [.11, .24] | < .001 | < .001 | 778 | .09 [.01, .17] | .027 | .134 | 592 |
| Extraversion | .08 [.01, .15] | .033 | .164 | 778 | –.12 [–.20, –.04] | .005 | .028 | 592 |
| Neuroticism | –.07 [–.14, –.00] | .043 | .173 | 778 | .03 [–.05, .11] | .466 | .889 | 592 |
| Narcissism | –.02 [–.09, .05] | .604 | .604 | 778 | .27 [.19, .34] | < .001 | < .001 | 592 |
| NFCS-15 | .14 [.07, .20] | < .001 | .001 | 778 | .27 [.19, .34] | < .001 | < .001 | 592 |

*Note.* All = full sample; Orth = Orthodox subsample. *N* varies due to missing data for specific variables. NAIT = National Identity Scale; AEQ = Aesthetic Experience Questionnaire; DSES = Daily Spiritual Experience Scale; NFCS-15 = Need for Closure Scale. Gender was coded as 1 = Female, 2 = Male.

# Table S10f. Correlations of the Sociocultural Factor with External Variables (Full Sample vs. Orthodox Subsample)

| Variable | *r* (All) [95% CI] | *p* (All) | *pHolm*​ (All) | *N* (All) | *r* (Orth) [95% CI] | *p* (Orth) | *pHolm​* (Orth) | *N* (Orth) |
| --- | --- | --- | --- | --- | --- | --- | --- | --- |
| Gender | .07 [–.00, .14] | .054 | .226 | 778 | .08 [–.00, .16] | .052 | .259 | 592 |
| Age | .03 [–.04, .10] | .350 | .701 | 778 | .05 [–.03, .13] | .190 | .379 | 592 |
| Education level | .20 [.13, .26] | < .001 | < .001 | 778 | .17 [.09, .25] | < .001 | < .001 | 592 |
| Religiosity | .13 [.06, .20] | < .001 | .001 | 778 | .31 [.24, .39] | < .001 | < .001 | 588 |
| NAIT | .28 [.21, .34] | < .001 | < .001 | 774 | .30 [.22, .37] | < .001 | < .001 | 592 |
| AEQ Total | .28 [.22, .35] | < .001 | < .001 | 778 | .18 [.10, .26] | < .001 | < .001 | 592 |
| DSES | .13 [.06, .20] | < .001 | .003 | 778 | .08 [–.00, .16] | .055 | .259 | 592 |
| Extraversion | .06 [–.01, .13] | .113 | .340 | 778 | –.03 [–.11, .06] | .528 | .528 | 592 |
| Neuroticism | .02 [–.05, .09] | .571 | .701 | 778 | –.07 [–.15, .02] | .109 | .326 | 592 |
| Narcissism | –.07 [–.14, –.00] | .045 | .226 | 778 | .22 [.14, .30] | < .001 | < .001 | 592 |
| NFCS-15 | .14 [.07, .21] | < .001 | .001 | 778 | .22 [.14, .30] | < .001 | < .001 | 592 |

*Note.* All = full sample; Orth = Orthodox subsample. *N* varies due to missing data for specific variables. NAIT = National Identity Scale; AEQ = Aesthetic Experience Questionnaire; DSES = Daily Spiritual Experience Scale; NFCS-15 = Need for Closure Scale. Gender was coded as 1 = Female, 2 = Male.

# Table S11. Orthodox versus non-Orthodox differences in external-validity correlations by FES dimension

**Visual–Aesthetic**

| Variable | r_Orth (N) | r_NonOrth (N) | Δr | z | p | p_Holm |
| --- | --- | --- | --- | --- | --- | --- |
| Gender | 0.078 (592) | 0.116 (186) | -0.038 | -0.453 | 0.650 | 1.000 |
| Age | 0.005 (592) | -0.049 (186) | 0.054 | 0.639 | 0.523 | 1.000 |
| Education level | 0.153 (592) | 0.202 (186) | -0.049 | -0.598 | 0.550 | 1.000 |
| Religiosity | 0.262 (588) | 0.064 (186) | 0.198 | 2.411 | 0.016 | 0.143 |
| NAIT | 0.351 (592) | 0.062 (186) | 0.289 | 3.598 | 0.000 | 0.004 |
| AEQ | 0.165 (592) | 0.304 (186) | -0.139 | -1.742 | 0.082 | 0.489 |
| DSES | 0.146 (592) | 0.009 (186) | 0.137 | 1.631 | 0.103 | 0.514 |
| Extraversion | -0.134 (592) | -0.015 (186) | -0.119 | -1.416 | 0.157 | 0.627 |
| Neuroticism | -0.046 (592) | 0.137 (186) | -0.183 | -2.173 | 0.030 | 0.208 |
| Narcissism | 0.213 (592) | 0.020 (186) | 0.193 | 2.320 | 0.020 | 0.163 |
| NFCS-15 | 0.213 (592) | 0.003 (186) | 0.210 | 2.521 | 0.012 | 0.117 |

***Note*.** rOrth = zero-order Pearson correlation in the Orthodox subgroup; rNonOrth = zero-order Pearson correlation in the non-Orthodox subgroup. N denotes the subgroup sample size used for the correlation. Δr = difference in correlations (rOrth − rNonOrth). z = Fisher r-to-z test statistic for the difference between independent correlations. p = two-tailed p value for the Fisher z test. pHolm = Holm–Bonferroni adjusted p value controlling the familywise error rate within each FES dimension (row block). Orth = Orthodox; NonOrth = non-Orthodox.

**Emotional**

| Variable | r_Orth (N) | r_NonOrth (N) | Δr | z | p | p_Holm |
| --- | --- | --- | --- | --- | --- | --- |
| Gender | 0.040 (592) | 0.074 (186) | -0.034 | -0.403 | 0.687 | 1.000 |
| Age | 0.044 (592) | 0.000 (186) | 0.044 | 0.520 | 0.603 | 1.000 |
| Education level | 0.159 (592) | 0.124 (186) | 0.035 | 0.422 | 0.673 | 1.000 |
| Religiosity | 0.338 (588) | 0.112 (186) | 0.226 | 2.826 | 0.005 | 0.042 |
| NAIT | 0.397 (592) | 0.117 (186) | 0.280 | 3.575 | 0.000 | 0.004 |
| AEQ | 0.264 (592) | 0.400 (186) | -0.136 | -1.811 | 0.070 | 0.491 |
| DSES | 0.106 (592) | 0.041 (186) | 0.065 | 0.772 | 0.440 | 1.000 |
| Extraversion | -0.114 (592) | -0.042 (186) | -0.072 | -0.856 | 0.392 | 1.000 |
| Neuroticism | -0.024 (592) | 0.023 (186) | -0.047 | -0.555 | 0.579 | 1.000 |
| Narcissism | 0.212 (592) | 0.029 (186) | 0.183 | 2.201 | 0.028 | 0.222 |
| NFCS-15 | 0.212 (592) | -0.064 (186) | 0.276 | 3.301 | 0.001 | 0.010 |

***Note*.** rOrth = zero-order Pearson correlation in the Orthodox subgroup; rNonOrth = zero-order Pearson correlation in the non-Orthodox subgroup. N denotes the subgroup sample size used for the correlation. Δr = difference in correlations (rOrth − rNonOrth). z = Fisher r-to-z test statistic for the difference between independent correlations. p = two-tailed p value for the Fisher z test. pHolm = Holm–Bonferroni adjusted p value controlling the familywise error rate within each FES dimension (row block). Orth = Orthodox; NonOrth = non-Orthodox.

**Cognitive**

| Variable | r_Orth (N) | r_NonOrth (N) | Δr | z | p | p_Holm |
| --- | --- | --- | --- | --- | --- | --- |
| Gender | 0.045 (592) | 0.110 (186) | -0.065 | -0.773 | 0.440 | 1.000 |
| Age | -0.035 (592) | -0.113 (186) | 0.078 | 0.927 | 0.354 | 1.000 |
| Education level | 0.048 (592) | 0.301 (186) | -0.253 | -3.103 | 0.002 | 0.019 |
| Religiosity | 0.279 (588) | 0.143 (186) | 0.136 | 1.684 | 0.092 | 0.646 |
| NAIT | 0.340 (592) | 0.057 (186) | 0.283 | 3.510 | 0.000 | 0.005 |
| AEQ | 0.507 (592) | 0.554 (186) | -0.047 | -0.773 | 0.439 | 1.000 |
| DSES | 0.079 (592) | 0.039 (186) | 0.040 | 0.474 | 0.635 | 1.000 |
| Extraversion | -0.139 (592) | -0.067 (186) | -0.072 | -0.860 | 0.390 | 1.000 |
| Neuroticism | -0.001 (592) | 0.044 (186) | -0.045 | -0.532 | 0.595 | 1.000 |
| Narcissism | 0.159 (592) | -0.015 (186) | 0.174 | 2.072 | 0.038 | 0.344 |
| NFCS-15 | 0.159 (592) | 0.004 (186) | 0.155 | 1.848 | 0.065 | 0.517 |

***Note*.** rOrth = zero-order Pearson correlation in the Orthodox subgroup; rNonOrth = zero-order Pearson correlation in the non-Orthodox subgroup. N denotes the subgroup sample size used for the correlation. Δr = difference in correlations (rOrth − rNonOrth). z = Fisher r-to-z test statistic for the difference between independent correlations. p = two-tailed p value for the Fisher z test. pHolm = Holm–Bonferroni adjusted p value controlling the familywise error rate within each FES dimension (row block). Orth = Orthodox; NonOrth = non-Orthodox.

**Communicative**

| Variable | r_Orth (N) | r_NonOrth (N) | Δr | z | p | p_Holm |
| --- | --- | --- | --- | --- | --- | --- |
| Gender | 0.070 (592) | 0.004 (186) | 0.066 | 0.781 | 0.435 | 1.000 |
| Age | -0.021 (592) | -0.244 (186) | 0.223 | 2.694 | 0.007 | 0.071 |
| Education level | 0.089 (592) | 0.241 (186) | -0.152 | -1.850 | 0.064 | 0.514 |
| Religiosity | 0.242 (588) | 0.104 (186) | 0.138 | 1.683 | 0.092 | 0.555 |
| NAIT | 0.348 (592) | 0.040 (186) | 0.308 | 3.818 | 0.000 | 0.001 |
| AEQ | 0.459 (592) | 0.323 (186) | 0.136 | 1.903 | 0.057 | 0.513 |
| DSES | 0.115 (592) | 0.104 (186) | 0.011 | 0.132 | 0.895 | 1.000 |
| Extraversion | -0.084 (592) | -0.025 (186) | -0.059 | -0.699 | 0.484 | 1.000 |
| Neuroticism | -0.002 (592) | 0.112 (186) | -0.114 | -1.353 | 0.176 | 0.881 |
| Narcissism | 0.202 (592) | 0.050 (186) | 0.152 | 1.829 | 0.067 | 0.514 |
| NFCS-15 | 0.202 (592) | 0.125 (186) | 0.077 | 0.935 | 0.350 | 1.000 |

***Note*.** rOrth = zero-order Pearson correlation in the Orthodox subgroup; rNonOrth = zero-order Pearson correlation in the non-Orthodox subgroup. N denotes the subgroup sample size used for the correlation. Δr = difference in correlations (rOrth − rNonOrth). z = Fisher r-to-z test statistic for the difference between independent correlations. p = two-tailed p value for the Fisher z test. pHolm = Holm–Bonferroni adjusted p value controlling the familywise error rate within each FES dimension (row block). Orth = Orthodox; NonOrth = non-Orthodox.

**Spiritual–Transformative**

| Variable | r_Orth (N) | r_NonOrth (N) | Δr | z | p | p_Holm |
| --- | --- | --- | --- | --- | --- | --- |
| Gender | 0.043 (592) | 0.108 (186) | -0.065 | -0.773 | 0.440 | 1.000 |
| Age | 0.042 (592) | -0.005 (186) | 0.047 | 0.556 | 0.578 | 1.000 |
| Education level | 0.078 (592) | 0.156 (186) | -0.078 | -0.935 | 0.350 | 1.000 |
| Religiosity | 0.417 (588) | 0.112 (186) | 0.305 | 3.915 | 0.000 | 0.001 |
| NAIT | 0.406 (592) | 0.079 (186) | 0.327 | 4.155 | 0.000 | 0.000 |
| AEQ | 0.406 (592) | 0.352 (186) | 0.054 | 0.745 | 0.456 | 1.000 |
| DSES | 0.091 (592) | 0.082 (186) | 0.009 | 0.107 | 0.915 | 1.000 |
| Extraversion | -0.116 (592) | -0.040 (186) | -0.076 | -0.904 | 0.366 | 1.000 |
| Neuroticism | 0.030 (592) | 0.108 (186) | -0.078 | -0.927 | 0.354 | 1.000 |
| Narcissism | 0.265 (592) | 0.002 (186) | 0.263 | 3.184 | 0.001 | 0.013 |
| NFCS-15 | 0.265 (592) | 0.068 (186) | 0.197 | 2.403 | 0.016 | 0.130 |

***Note*** rOrth = zero-order Pearson correlation in the Orthodox subgroup; rNonOrth = zero-order Pearson correlation in the non-Orthodox subgroup. N denotes the subgroup sample size used for the correlation. Δr = difference in correlations (rOrth − rNonOrth). z = Fisher r-to-z test statistic for the difference between independent correlations. p = two-tailed p value for the Fisher z test. pHolm = Holm–Bonferroni adjusted p value controlling the familywise error rate within each FES dimension (row block). Orth = Orthodox; NonOrth = non-Orthodox.

**Sociocultural**

| Variable | r_Orth (N) | r_NonOrth (N) | Δr | z | p | p_Holm |
| --- | --- | --- | --- | --- | --- | --- |
| Gender | 0.080 (592) | 0.083 (186) | -0.003 | -0.036 | 0.972 | 1.000 |
| Age | 0.054 (592) | -0.091 (186) | 0.145 | 1.717 | 0.086 | 0.516 |
| Education level | 0.168 (592) | 0.254 (186) | -0.086 | -1.064 | 0.287 | 1.000 |
| Religiosity | 0.314 (588) | 0.055 (186) | 0.259 | 3.187 | 0.001 | 0.014 |
| NAIT | 0.299 (592) | 0.086 (186) | 0.213 | 2.626 | 0.009 | 0.069 |
| AEQ | 0.178 (592) | 0.262 (186) | -0.084 | -1.044 | 0.297 | 1.000 |
| DSES | 0.079 (592) | 0.054 (186) | 0.025 | 0.297 | 0.767 | 1.000 |
| Extraversion | -0.026 (592) | -0.054 (186) | 0.028 | 0.331 | 0.740 | 1.000 |
| Neuroticism | -0.066 (592) | 0.213 (186) | -0.279 | -3.337 | 0.001 | 0.009 |
| Narcissism | 0.221 (592) | -0.030 (186) | 0.251 | 3.010 | 0.003 | 0.024 |
| NFCS-15 | 0.221 (592) | 0.065 (186) | 0.156 | 1.886 | 0.059 | 0.415 |

***Note*.** rOrth = zero-order Pearson correlation in the Orthodox subgroup; rNonOrth = zero-order Pearson correlation in the non-Orthodox subgroup. N denotes the subgroup sample size used for the correlation. Δr = difference in correlations (rOrth − rNonOrth). z = Fisher r-to-z test statistic for the difference between independent correlations. p = two-tailed p value for the Fisher z test. pHolm = Holm–Bonferroni adjusted p value controlling the familywise error rate within each FES dimension (row block). Orth = Orthodox; NonOrth = non-Orthodox.

# Appendix S1. Fresco Experience Scale (FES) and Additional Items

## Questionnaire instruction in Serbian (original wording)

**Freske u religioznoj umetnosti: Doživljaj i značaj**

Freske su religiozna umetnost u sakralnim prostorima (npr. crkve i manastiri) ili u njihovim vernim reprodukcijama. U ovom delu upitnika interesuje nas kako ljudi doživljavaju freske.

**Kako da odgovarate:**

- Molimo vas da se prisetite svojih iskustava posmatranja fresaka (u stvarnom prostoru ili u vernim reprodukcijama).
- Ako ste freske videli retko ili samo u reprodukcijama, odgovorite na osnovu onoga što vam je dostupno iskustveno i kako biste se vi tipično osećali u takvom okruženju.
- Posmatranje ovde podrazumeva svesno zaustavljanje i fokus na scene, simbole, svetlost i kompoziciju (ne samo prolazno gledanje ili fotografisanje bez razmatranja).
- Ne postoje tačni ili netačni odgovori. Odgovarajte iskreno, prema svom doživljaju.

**Zadatak:** Procenite u kojoj meri se slažete sa svakom tvrdnjom.

**Skala:** 1 = Uopšte se ne slažem … 7 = Potpuno se slažem.

**Važno:** Vaši odgovori su anonimni i biće korišćeni isključivo u istraživačke svrhe.

## Questionnaire instruction in English (translation for Supplement)

**Frescoes in Religious Art: Experience and Meaning**

Frescoes are a form of religious art found in sacred spaces (e.g., churches and monasteries) or in faithful reproductions. In this part of the questionnaire, we are interested in how people experience frescoes.

**How to respond:**

- Please draw on your experiences of viewing frescoes (in a real setting or through faithful reproductions).
- If you have seen frescoes only rarely or only in reproductions, respond based on what is available to you experientially and how you would typically feel in such a setting.
- Here, viewing implies a deliberate pause and focused attention to scenes, symbols, light, and composition (rather than merely glancing at the artwork or taking photographs without reflection).
- There are no right or wrong answers. Please respond honestly, based on your experience.

**Task:** Indicate the extent to which you agree with each statement.

**Response scale:** 1 = Strongly disagree … 7 = Strongly agree.

**Important:** Your responses are anonymous and will be used for research purposes only.

## Fresco Experience Scale (FES) and Additional Items (n = 42)

| **Item ID** | **Dimension** | **Items wording (Serbian)** | **Items wording (English)** |
| --- | --- | --- | --- |
| FES_01 | Visual-Aesthetic | Svetlost na freskama stvara poseban vizuelni doživljaj. | The light in the frescoes creates a distinctive visual experience. |
| FES_02 | Visual-Aesthetic | Kompozicija fresaka stvara osećaj harmonije i reda. | The composition of the frescoes creates a sense of harmony and order. |
| FES_03 | Visual-Aesthetic | Freske su estetski privlačne i vizuelno zadivljujuće. | The frescoes are aesthetically appealing and visually striking. |
| FES_04 | Visual-Aesthetic | Arhitektonski prostor crkve ili manastira i freske zajedno čine harmoničnu celinu. | The architectural space of the church or monastery and the frescoes together form a harmonious whole. |
| FES_05 | Visual-Aesthetic | Freske izgledaju kao pažljivo osmišljena umetnička dela. | The frescoes appear as carefully conceived works of art. |
| FES_06 | Visual-Aesthetic | Dok posmatram freske, primećujem preciznost i posvećenost umetničkom radu. | While observing the frescoes, I notice precision and dedication in the artistic workmanship. |
| FES_07 | Emotional | Freske u meni izazivaju osećaj topline i emocionalne bliskosti. | The frescoes evoke a feeling of warmth and emotional closeness in me. |
| FES_08 | Emotional | Freske me podstiču na analizu sopstvenih emocija. | The frescoes prompt me to analyse my own emotions. |
| FES_09 | Emotional | Freske u meni izazivaju osećaj emotivne povezanosti sa prikazanim scenama. | The frescoes evoke a sense of emotional connection with the depicted scenes. |
| FES_10 | Emotional | Freske mi pomažu da pronađem osećaj unutrašnjeg balansa. | The frescoes help me find a sense of inner balance. |
| FES_11 | Emotional | Freske podstiču saosećanje prema likovima i scenama koje prikazuju. | The frescoes encourage empathy towards the figures and scenes they portray. |
| FES_12 | Emotional | Posmatranje fresaka budi različite emocije u meni. | Viewing the frescoes awakens a range of emotions in me. |
| FES_13 | Cognitive | Freske me podstiču da razmišljam o istorijskom kontekstu u kojem su nastale. | The frescoes prompt me to think about the historical context in which they were created. |
| FES_14 | Cognitive | Freske me podstiču da preispitam značenje određenih verskih simbola. | The frescoes encourage me to reconsider the meaning of certain religious symbols. |
| FES_15 | Cognitive | Freske me inspirišu da istražujem više o umetničkom i istorijskom kontekstu. | The frescoes inspire me to explore more about their artistic and historical context. |
| FES_16 | Cognitive | Razmišljam o tehnikama i umeću umetnika koji su stvorili freske. | I think about the techniques and craftsmanship of the artists who created the frescoes. |
| FES_17 | Cognitive | Detalji na freskama otkrivaju složene ideje koje me podstiču na razmišljanje. | Details in the frescoes reveal complex ideas that stimulate my thinking. |
| FES_18 | Cognitive | Freske me podstiču da razmišljam o teološkim ili ikonografskim značenjima. | The frescoes lead me to reflect on theological or iconographic meanings. |
| FES_19 | Communicative | Boje i svetlost na freskama prenose određenu poruku. | The colours and light in the frescoes convey a particular message. |
| FES_20 | Communicative | Gestovi i izrazi lica na likovima sa fresaka deluju kao da šalju poruku. | The gestures and facial expressions of the figures in the frescoes seem to send a message. |
| FES_21 | Communicative | Scene na freskama komuniciraju univerzalne poruke o životu i veri. | The scenes in the frescoes communicate universal messages about life and faith. |
| FES_22 | Communicative | Freske prenose emocije koje mogu jasno da razumem. | The frescoes convey emotions that I can clearly understand. |
| FES_23 | Communicative | Freske uspešno prenose priču kroz slike i detalje. | The frescoes successfully tell a story through images and details. |
| FES_24 | Communicative | Dok gledam freske, imam utisak da učestvujem u nekoj vrsti tihog dijaloga. | When looking at the frescoes, I have the impression of taking part in a kind of silent dialogue. |
| FES_25 | Spiritual-Transformative | Freske podstiču introspektivno promišljanje o sopstvenim vrednostima. | The frescoes encourage introspective reflection on my own values. |
| FES_26 | Spiritual-Transformative | Posmatranje fresaka menja moj pogled na duhovne aspekte života. | Viewing the frescoes changes my outlook on the spiritual aspects of life. |
| FES_27 | Spiritual-Transformative | Dok posmatram freske, osećam osećaj duhovnog uzdizanja. | While observing the frescoes, I feel a sense of spiritual uplift. |
| FES_28 | Spiritual-Transformative | Freske izazivaju osećaj unutrašnje obnove. | The frescoes evoke a sense of inner renewal. |
| FES_29 | Spiritual-Transformative | Doživljaj fresaka ostavlja dugotrajan trag na moje duhovno stanje. | The experience of the frescoes leaves a lasting mark on my spiritual state. |
| FES_30 | Spiritual-Transformative | Nakon posmatranja fresaka, osećam unutrašnju promenu u načinu na koji doživljavam svet. | After observing the frescoes, I feel an inner change in the way I experience the world. |
| FES_31 | Sociocultural | Freske odražavaju vrednosti i verovanja zajednice iz koje potiču. | The frescoes reflect the values and beliefs of the community from which they originate. |
| FES_32 | Sociocultural | Freske imaju važnu ulogu u očuvanju identiteta naše zajednice. | The frescoes play an important role in preserving our community’s identity. |
| FES_33 | Sociocultural | Freske prenose poruke i vrednosti iz prošlosti našim generacijama. | The frescoes convey messages and values from the past to our generations. |
| FES_34 | Sociocultural | Freske predstavljaju most između prošlih i sadašnjih generacija. | The frescoes represent a bridge between past and present generations. |
| FES_35 | Sociocultural | Freske podsećaju na značajne trenutke iz istorije naše zajednice. | The frescoes remind us of important moments in our community’s history. |
| FES_36 | Sociocultural | Očuvanje fresaka je važno za očuvanje kulturnog identiteta naše zajednice. | Preserving the frescoes is important for safeguarding our community’s cultural identity. |
| ADD_01 | Visual-Aesthetic | Svetlost i senke na freskama dodaju dinamiku i životnost prikazanim scenama. | Light and shadow in the frescoes add dynamism and vitality to the depicted scenes. |
| ADD_02 | Emotional | Freske izazivaju osećaj unutrašnjeg mira i spokoja u meni. | The frescoes evoke a sense of inner peace and tranquillity in me. |
| ADD_03 | Cognitive | Dok analiziram freske, promišljam o univerzalnim životnim pitanjima. | When I analyse the frescoes, I reflect on universal questions of life. |
| ADD_04 | Communicative | Čak i bez objašnjenja, freske uspevaju da prenesu svoju poruku. | Even without explanations, the frescoes manage to convey their message. |
| ADD_05 | Spiritual-Transformative | Dok posmatram freske, osećam kao da sam deo nečeg većeg od sebe. | While observing the frescoes, I feel as if I am part of something greater than myself. |
| ADD_06 | Sociocultural | Posmatranje fresaka u meni budi osećaj ponosa zbog naše kulturne baštine. | Viewing the frescoes awakens a sense of pride in our cultural heritage. |

## Scoring

Each dimension score was computed as the mean of the six items belonging to that dimension, preserving the original 1–7 metric; higher scores indicate stronger endorsement of the corresponding aspect of fresco experience (e.g., Visual–Aesthetic = mean of FES_01–FES_06).

# Appendix S2. FES Development

The development of the Fresco Experience Scale (FES) followed a systematic, multi-stage process integrating theoretical frameworks, qualitative inquiry, expert consultation, and empirical refinement. This rigorous approach ensured that the final instrument captured the multifaceted nature of subjective experiences with religious art whilst maintaining psychometric integrity (see Figure S1).

## Theoretical Foundation and Initial Item Generation

Item generation was grounded in Csikszentmihalyi and Robinson's (1990) model of aesthetic experience, which posits four core dimensions of art engagement: perceptive, emotional, cognitive, and communicative responses. To adapt this framework to the domain of religious art, we conducted a systematic review of 52 theoretical and empirical sources addressing aesthetic, religious, and cultural dimensions of art experience. This literature synthesis identified three additional domains salient to religious art encounters: spiritual experiences, transformative impact, and sociocultural significance. Based on this expanded theoretical model, we generated an initial pool designed to operationalise seven preliminary dimensions: Perceptual, Emotional, Cognitive, Communicative, Spiritual, Aesthetic, and Transformative. Sociocultural meaning was treated as a candidate domain during the literature synthesis and was subsequently formalised as a distinct dimension based on qualitative evidence (see below).

## Qualitative Validation and Dimension Refinement

To ensure ecological validity and cultural appropriateness, we conducted a qualitative study with 90 participants (13 semi-structured interviews, 32 online surveys, and 45 respondents completing a visual-response task). Interview participants were recruited through purposive sampling to represent diverse levels of religious engagement and art expertise. The visual-response task presented nine representative medieval Serbian frescoes, selected to span key iconographic themes (Christological, Marian, hagiographic, and eschatological), and participants provided open-ended descriptions of their experiences.

****Figure S1****

**FES development and validation workflow.**

Thematic analysis of the 288 qualitative responses yielded rich phenomenological descriptions across the theoretical dimensions, with response frequencies ranging from 97 (Emotional) to 12 (preliminary Sociocultural). Frequencies refer to the number of coded responses in which a theme was present (responses could contain multiple themes). This analysis revealed three key insights that informed dimension refinement. First, perceptive and aesthetic responses were empirically inseparable, as participants consistently described sensory experiences in evaluative aesthetic terms; these were therefore consolidated into a single *Visual–Aesthetic* dimension. Second, spiritual experiences were invariably described as catalysing lasting personal change, leading to the integration of Spiritual and Transformative dimensions into a unified *Spiritual–Transformative* construct. Third, and unexpectedly, a substantial subset of responses emphasised the cultural-historical significance and collective identity functions of frescoes—themes not captured by the initial framework. This emergent pattern led to the formal inclusion of a *Sociocultural* dimension. The final model thus comprised six dimensions: Visual–Aesthetic, Emotional, Cognitive, Communicative, Spiritual–Transformative, and Sociocultural.

## Pilot Testing and Item Refinement

Based on the refined six-dimension model and qualitative themes, we generated a pilot item pool of 68 statements (10–13 items per dimension) formulated as declarative sentences rated on a 7-point Likert scale (1 = *strongly disagree*, 7 = *strongly agree*). Items were designed to be theoretically aligned, linguistically accessible to lay respondents, and free from technical jargon. The pilot instrument was administered to 425 participants (*Mage* = 26.40, *SD* = 12.08; 78.1% female; 93.9% Orthodox Christian) recruited via online platforms and in-person at monastery sites during January–February 2025.

Exploratory factor analysis (EFA) using principal axis factoring with oblimin rotation confirmed the six-factor structure (Kaiser-Meyer-Olkin = .982; Bartlett's test: *χ²*(2278) = 43464.35, *p* < .001). Parallel analysis corroborated the retention of six factors. To optimise efficiency whilst preserving coverage, we selected six items per dimension based on (a) strong primary pattern loadings (typically ≥ .60), (b) content representativeness of the qualitative themes, and (c) minimal redundancy. This yielded a 36-item version (6 items × 6 dimensions) that was subjected to confirmatory factor analysis in the main study sample. The item reduction process prioritised factor loadings, content representativeness, minimal redundancy, and theoretical coherence.

This iterative, mixed-methods approach—integrating literature review, qualitative inquiry, and quantitative psychometric evaluation—ensured that the FES is both theoretically grounded and empirically robust, capturing the complexity of religious art experience in a parsimonious, psychometrically sound instrument.

# Appendix S3. External measures

**Religiosity**. Religiosity was assessed to establish the convergent validity of the FES, specifically to examine how personal and institutional religious commitment relates to the spiritual and sociocultural dimensions of the fresco experience. This was measured using a brief self-report scale adapted from the Strayhorn Religiousness Scale (Strayhorn et al., 1990; Serbian version by Belić, 2009). The 12-item instrument captures private expressions (e.g., personal prayer) and public practices (e.g., church attendance). Because the items utilised non-identical response ranges (predominantly 5-point scales, with some using fewer categories), all items were standardised into *z*-scores prior to aggregation to ensure equal weighting. The total religiosity score was then computed as the mean of these standardised values (*M* = 0.00, *SD* = 0.661), where higher scores indicate greater religiosity. Internal consistency for the standardised composite was high (*α* = .88, *ω* = .89). Religious affiliation was recorded as a separate categorical demographic variable.

**Daily spiritual experience.** To further examine the relationship between fresco engagement and frequent sensations of transcendence, we employed the Daily Spiritual Experience Scale (DSES; Underwood, 2011). The DSES measures the frequency of ordinary spiritual experiences, such as sensing a divine presence or feeling inner peace. In accordance with the scale's protocol, participants who felt uncomfortable with the term "God" were instructed to substitute it with an equivalent term for the divine or holy. For this study, the 15 frequency items were utilised (excluding the 16th item on general closeness to God). Items were rated on a 6-point scale (1 – *Never* to 6 - *Many times a day*), and a total score was computed as the mean of the 15 items. Internal consistency in the current sample was excellent (*α* = .96, *ω* = .97).

**Aesthetic experience.**  To provide evidence for convergent validity, aesthetic engagement was measured using the Aesthetic Experience Questionnaire (AEQ; Wanzer et al., 2020). The AEQ operationalises the aesthetic-experience framework of Csikszentmihalyi and Robinson (1990), capturing both art-related responses (perceptual, emotional, cultural, and cognitive) and flow-related experiences during art viewing. The scale comprises 22 items rated on a 7-point Likert-type scale (1 = *strongly disagree* to 7 = *strongly agree).* In the present study, an overall mean composite score was utilised, where higher scores indicate more intense aesthetic and flow-like experiences. Internal consistency in the current sample was excellent (*α* = .95, *ω* = .95).

**National Identification (NAIT)**. National identification was assessed to examine the sociocultural dimension of the fresco experience, given the status of medieval frescoes as significant markers of national heritage. This was measured using the National Identity Scale (NAIT; Čorkalo & Kamenov, 1998), which consists of 27 statements (e.g., “I am proud of my nation’s history”) rated on a 5-point Likert agreement scale. Items were scored and aggregated such that higher mean scores reflect a more strongly expressed national identity. While previous research has reported reliability coefficients ranging from .80 to .94 (e.g., Kamenov at al., 2006), the internal consistency in the present sample was high (*α* = .86; *ω* = .86).

**Personality Traits.** To evaluate the divergent validity of the FES, Extraversion and Neuroticism were assessed using the Serbian adaptation (Čerović et al., 2013) of the Big Five Inventory–44 (BFI-44; John, Donahue, & Kentle, 1991; John, Naumann, & Soto, 2008; Benet-Martínez & John, 1998). The BFI-44 is a widely validated self-report inventory that utilises a 5-point Likert-type scale (1 = *strongly disagree* to 5 = *strongly agree*).

Extraversion was operationalised using eight items, intended to test whether fresco engagement is distinct from general social orientation. After reverse-scoring negatively keyed items, a mean scale score was computed, where higher values indicate higher levels of extraversion. Internal consistency in the present sample was acceptable (*α* = .70, *ω* = .71).

Neuroticism was also measured with eight items to determine if reported emotional and spiritual fresco experiences were independent of general emotional volatility. Scale scores were computed as the mean of the items, with higher scores reflecting higher neuroticism. The subscale demonstrated good internal consistency in this sample (α = .75, ω = .74).

**Narcissism**. To establish divergent validity and ensure that responses to frescoes are distinct from self-enhancement tendencies, narcissism was measured using the subscale from the Short Dark Triad (SD3; Jones & Paulhus, 2014; Serbian adaptation by Dinić et al., 2018). This nine-item subscale captures agentic and grandiose self-perceptions (e.g., leadership and uniqueness) on a 5-point Likert-type scale (1 = *strongly disagree* to 5 = *strongly agree*). Following the reverse-scoring of three items, a mean composite score was computed, with higher values reflecting higher narcissistic traits. Internal consistency in the current sample was *α* = .66, *ω* = .66.

**Need for Closure.** Need for closure was measured to explore the relationship between a preference for cognitive certainty and the interpretative, cognitive dimension of the fresco experience. Individual differences in motivated cognition were assessed using the 15-item short-form Need for Closure Scale (NFCS-15; Roets & Van Hiel, 2011; Serbian adaptation by Žeželj & Petrović, 2022). The NFCS-15 measures the preference for clear, definite answers and the discomfort associated with ambiguity. Participants indicated their agreement on a 6-point Likert-type scale 1 = *strongly disagree* to 6 = *strongly agree*). A total score was calculated as the mean of all 15 items, with higher scores indicating a stronger need for closure **(***α* = .87, *ω* = .87).

**Translation and Adaptation**. All instruments were administered in Serbian. For measures without existing validated Serbian versions (DSES and AEQ), a rigorous forward–backward translation procedure was employed to ensure conceptual equivalence. Two independent bilingual translators (professional language editors at the Faculty of Philosophy) first translated the items into Serbian. These translations were then reconciled by a psychologist from the research team to ensure psychological and terminological accuracy. Finally, a third independent bilingual expert back-translated the Serbian version into English. Any discrepancies were resolved through consensus to ensure the final Serbian items accurately reflected the original theoretical constructs. The translated items were reviewed for clarity by members of the research team prior to fielding.

# Appendix S4. Sensitivity analyses for invariance (parameterisation, category collapsing, decision rules, nearby partial-metric specs)

**Parameterisation Sensitivity (WLSMV THETA versus DELTA).** To ensure that invariance conclusions were not contingent upon the specific WLSMV parameterisation, the multi-group CFA sequence was repeated using the DELTA parameterisation as an alternative to the primary THETA-based approach. For gender, re-estimating the configural, metric, and scalar models yielded identical substantive conclusions; model fit remained acceptable and the pattern of invariance was unchanged. For religious affiliation, the threshold/scalar specification did not converge under THETA parameterisation but converged under DELTA; conclusions were unchanged. Even under DELTA, however, imposing threshold equality resulted in a marked deterioration in fit, confirming that the rejection of scalar invariance was robust to the choice of parameterisation.

**Decision-Rule Sensitivity (DIFFTEST versus Practical Fit Change).** In addition to the *χ²*-based DIFFTEST, we evaluated changes in approximate fit indices (ΔCFI and ΔRMSEA; see Supplementary Table S8). For gender, the CFI increased across steps (ΔCFI ≥ +.007) and the RMSEA decreased (ΔRMSEA = –.012), consistent with retaining the threshold/scalar model for gender. For religious affiliation, while the transition to partial metric invariance showed negligible fit changes, the transition to scalar invariance produced a substantial decline in fit (ΔCFI = –.092; ΔRMSEA = +.043). These practical fit indices provided unambiguous support for the decisions reached via the DIFFTEST.

**Sensitivity to Sparse Response Categories (Ordinal Indicators).** To test whether the lack of threshold/scalar invariance for religious identification reflected sparse category use, we collapsed low-frequency categories for affected items and re-estimated the MG-CFA models. The configural and (partial) metric models retained acceptable fit, whereas the threshold/scalar model continued to show a large decrement (*Δχ²*(153) = 2,775.04, *p* < .001; ΔCFI = −.093), indicating that the non-invariance conclusion was robust to category-collapsing. Category-collapsing was concentrated within the same subset of items that showed non-invariant loadings in the partial metric solution.

**Model-Specification Sensitivity. T**o assess dependence on the specific partial-metric specification, we re-estimated the metric model using a nearby alternative constraint set (reinstating invariance for one loading; Item 10; Supplementary Table S14, below). Global fit was virtually identical (both models: CFI = .956; RMSEA = .066). In contrast, imposing threshold/scalar invariance again produced substantial deterioration in fit in both specifications, with DIFFTEST strongly rejecting threshold equality (*ps* < .001). Accordingly, religious-identification analyses were retained at the (partial) metric level and did not interpret latent mean differences.

Table S14
*Model-Specification Sensitivity for Religious Affiliation: Retained versus Alternative Partial Metric and Scalar Tests*

| Model | Free params | CFI | RMSEA | SRMR | DIFFTEST (A3 v. A2) |
| --- | --- | --- | --- | --- | --- |
| A2-H1 original (partial metric) | 511 | .956 | .066 | .060 | — |
| A2-H1 alternative (partial metric) | 510 | .956 | .066 | .060 | — |
| A3 original (scalar test) | 350 | .864 | .109 | .066 | Δχ²(161)=2845.209, p<.001 |
| A3 alternative (scalar test) | 343 | .858 | .111 | .066 | Δχ²(167)=2999.737, p<.001 |

# Appendix S5. Mplus syntax for competing measurement models (FES)

## Model A: One-factor CFA

TITLE: FES CFA – One-factor model;

DATA: FILE IS FES-analysis.csv;

VARIABLE:

NAMES ARE

Gender Age Educlev Rlgaff Ethnaff

FES_01-FES_42

REL_01-REL_12

NAT_01-NAT_32

AEQ_01-AEQ_22

DSES_01-DSES_16

Extr_01-Extr_08 Neurot_01-Neurot_08

Narcis_01-Narcis_09

NFCS-15_01-NFCS-15_15

Acc12 Acc14;

USEVARIABLES ARE FES_01-FES_36;

CATEGORICAL ARE FES_01-FES_36;

MISSING ARE ALL (9999);

! Optional: filter retained cases if file includes excluded respondents

USEOBSERVATIONS ARE (Acc12 EQ 1);

ANALYSIS:

ESTIMATOR = WLSMV;

PARAMETERIZATION = THETA;

ITERATIONS = 10000;

MODEL:

G BY FES_01-FES_36;

OUTPUT:

SAMPSTAT STANDARDIZED MODINDICES(ALL);

TECH4 TECH10;

## Model B: Six correlated first-order factors

TITLE: FES CFA – Six correlated factors (WLSMV, THETA);

DATA: FILE IS FES-analysis.csv;

VARIABLE:

NAMES ARE

Gender Age Educlev Rlgaff Ethnaff

FES_01-FES_42

REL_01-REL_12

NAT_01-NAT_32

AEQ_01-AEQ_22

DSES_01-DSES_16

Extr_01-Extr_08 Neurot_01-Neurot_08

Narcis_01-Narcis_09

NFCS-15_01-NFCS-15_15

Acc12 Acc14;

USEVARIABLES ARE FES_01-FES_36;

CATEGORICAL ARE FES_01-FES_36;

MISSING ARE ALL (9999);

! Optional: filter retained cases if file includes excluded respondents

USEOBSERVATIONS ARE (Acc12 EQ 1);

ANALYSIS:

ESTIMATOR = WLSMV;

PARAMETERIZATION = THETA;

ITERATIONS = 10000;

MODEL:

Visual BY FES_01 FES_02 FES_03 FES_04 FES_05 FES_06;

Emot BY FES_07 FES_08 FES_09 FES_10 FES_11 FES_12;

Cogn BY FES_13 FES_14 FES_15 FES_16 FES_17 FES_18;

Comm BY FES_19 FES_20 FES_21 FES_22 FES_23 FES_24;

Spir BY FES_25 FES_26 FES_27 FES_28 FES_29 FES_30;

Socio BY FES_31 FES_32 FES_33 FES_34 FES_35 FES_36;

OUTPUT:

SAMPSTAT STANDARDIZED MODINDICES(ALL);

TECH4 TECH10;

## Model C: Higher-order model

TITLE: FES CFA – Higher-order model (Global on six first-order);

DATA: FILE IS FES-analysis.csv;

VARIABLE:

NAMES ARE

Gender Age Educlev Rlgaff Ethnaff

FES_01-FES_42

REL_01-REL_12

NAT_01-NAT_32

AEQ_01-AEQ_22

DSES_01-DSES_16

Extr_01-Extr_08 Neurot_01-Neurot_08

Narcis_01-Narcis_09

NFCS-15_01-NFCS-15_15

Acc12 Acc14;

USEVARIABLES ARE FES_01-FES_36;

CATEGORICAL ARE FES_01-FES_36;

MISSING ARE ALL (9999);

! Optional: filter retained cases if file includes excluded respondents

USEOBSERVATIONS ARE (Acc12 EQ 1);

ANALYSIS:

ESTIMATOR = WLSMV;

PARAMETERIZATION = THETA;

ITERATIONS = 10000;

MODEL:

Visual BY FES_01 FES_02 FES_03 FES_04 FES_05 FES_06;

Emot BY FES_07 FES_08 FES_09 FES_10 FES_11 FES_12;

Cogn BY FES_13 FES_14 FES_15 FES_16 FES_17 FES_18;

Comm BY FES_19 FES_20 FES_21 FES_22 FES_23 FES_24;

Spir BY FES_25 FES_26 FES_27 FES_28 FES_29 FES_30;

Socio BY FES_31 FES_32 FES_33 FES_34 FES_35 FES_36;

Global BY Visual Emot Cogn Comm Spir Socio;

OUTPUT:

SAMPSTAT STANDARDIZED MODINDICES(ALL);

TECH4 TECH10;

# ****Appendix S6.**** Mplus syntax for ****Short-Form Model Comparison****

## FES six-factor CFA (see Appendix S1, Model B)

## FES-30 CFA

TITLE: FES-30 CFA – six correlated factors (WLSMV, THETA);

DATA: FILE IS FES-analysis.csv;

VARIABLE:

NAMES ARE

Gender Age Educlev Rlgaff Ethnaff

FES_01-FES_42

REL_01-REL_12

NAT_01-NAT_32

AEQ_01-AEQ_22

DSES_01-DSES_16

Extr_01-Extr_08 Neurot_01-Neurot_08

Narcis_01-Narcis_09

NFCS-15_01-NFCS-15_15

Acc12 Acc14;

USEVARIABLES ARE FES_01 FES_02 FES_03 FES_04 FES_05

FES_07 FES_09 FES_10 FES_11 FES_12

FES_13 FES_14 FES_15 FES_17 FES_18

FES_20 FES_21 FES_22 FES_23 FES_24

FES_25 FES_26 FES_27 FES_28 FES_29

FES_31 FES_32 FES_33 FES_35 FES_36;

CATEGORICAL ARE FES_01 FES_02 FES_03 FES_04 FES_05

FES_07 FES_09 FES_10 FES_11 FES_12

FES_13 FES_14 FES_15 FES_17 FES_18

FES_20 FES_21 FES_22 FES_23 FES_24

FES_25 FES_26 FES_27 FES_28 FES_29

FES_31 FES_32 FES_33 FES_35 FES_36;

MISSING ARE ALL (9999);

! Optional: filter retained cases if file includes excluded respondents

USEOBSERVATIONS ARE (Acc12 EQ 1);

ANALYSIS:

ESTIMATOR = WLSMV;

PARAMETERIZATION = THETA;

ITERATIONS = 10000;

MODEL:

Visual BY FES_01 FES_02 FES_03 FES_04 FES_05;

Emot BY FES_07 FES_09 FES_10 FES_11 FES_12;

Cogn BY FES_13 FES_14 FES_15 FES_17 FES_18;

Comm BY FES_20 FES_21 FES_22 FES_23 FES_24;

Spir BY FES_25 FES_26 FES_27 FES_28 FES_29;

Socio BY FES_31 FES_32 FES_33 FES_35 FES_36;

OUTPUT:

SAMPSTAT STANDARDIZED MODINDICES(ALL);

TECH4 TECH10;

## FES-24 CFA

TITLE: FES-24 CFA – six correlated factors (WLSMV, THETA);

DATA: FILE IS FES-analysis.csv;

VARIABLE:

NAMES ARE

Gender Age Educlev Rlgaff Ethnaff

FES_01-FES_42

REL_01-REL_12

NAT_01-NAT_32

AEQ_01-AEQ_22

DSES_01-DSES_16

Extr_01-Extr_08 Neurot_01-Neurot_08

Narcis_01-Narcis_09

NFCS-15_01-NFCS-15_15

Acc12 Acc14;

USEVARIABLES ARE FES_01 FES_02 FES_03 FES_04

FES_07 FES_09 FES_10 FES_12

FES_13 FES_14 FES_17 FES_18

FES_20 FES_21 FES_22 FES_23

FES_25 FES_27 FES_28 FES_29

FES_32 FES_33 FES_35 FES_36;

CATEGORICAL ARE FES_01 FES_02 FES_03 FES_04

FES_07 FES_09 FES_10 FES_12

FES_13 FES_14 FES_17 FES_18

FES_20 FES_21 FES_22 FES_23

FES_25 FES_27 FES_28 FES_29

FES_32 FES_33 FES_35 FES_36;

MISSING ARE ALL (9999);

! Optional: filter retained cases if file includes excluded respondents

USEOBSERVATIONS ARE (Acc12 EQ 1);

ANALYSIS:

ESTIMATOR = WLSMV;

PARAMETERIZATION = THETA;

ITERATIONS = 10000;

MODEL:

Visual BY FES_01 FES_02 FES_03 FES_04;

Emot BY FES_07 FES_09 FES_10 FES_12;

Cogn BY FES_13 FES_14 FES_17 FES_18;

Comm BY FES_20 FES_21 FES_22 FES_23;

Spir BY FES_25 FES_27 FES_28 FES_29;

Socio BY FES_32 FES_33 FES_35 FES_36;

OUTPUT:

SAMPSTAT STANDARDIZED MODINDICES(ALL);

TECH4 TECH10;

# Appendix S7. Mplus invariance syntax (A1, A2 and A3) for gender and Religious Affiliation.

## Gender

## Model A1 - Configural

TITLE:

FES Gender invariance – A1 Configural (WLSMV; THETA; DIFFTEST save)

DATA:

FILE = FES-analysis-invariance.csv;

VARIABLE:

NAMES = Gender Age Educlev Rlgaff Ethnaff

FES_01-FES_42 REL_01-REL_12 NAT_01-NAT_32 AEQ_01-AEQ_22

DSES_01-DSES_16 Extr_01-Extr_08 Neurot_01-Neurot_08

Narcis_01-Narcis_09 NFCS-15_01-NFCS-15_15 Acc12 Acc14;

USEVARIABLES ARE FES_01-FES_36;

CATEGORICAL ARE FES_01-FES_36;

MISSING ARE ALL (9999);

USEOBSERVATIONS ARE (Acc12 EQ 1);

GROUPING IS Gender (0 = Male 1 = Female);

DEFINE:

! FES_05 ima 6 kategorija: pomeri opseg 2–7 -> 1–6

IF (FES_05 EQ 1) THEN FES_05 = 2;

FES_05 = FES_05 - 1;

ANALYSIS:

ESTIMATOR = WLSMV;

PARAMETERIZATION = THETA;

MODEL = CONFIGURAL;

MODEL:

! Marker opterecenje @1 za prvi indikator svakog faktora

VISUAL BY

FES_01@1;

VISUAL BY FES_02;

VISUAL BY FES_03;

VISUAL BY FES_04;

VISUAL BY FES_05;

VISUAL BY FES_06;

EMOT BY

FES_07@1;

EMOT BY FES_08;

EMOT BY FES_09;

EMOT BY FES_10;

EMOT BY FES_11;

EMOT BY FES_12;

COGN BY

FES_13@1;

COGN BY FES_14;

COGN BY FES_15;

COGN BY FES_16;

COGN BY FES_17;

COGN BY FES_18;

COMM BY

FES_19@1;

COMM BY FES_20;

COMM BY FES_21;

COMM BY FES_22;

COMM BY FES_23;

COMM BY FES_24;

SPIR BY

FES_25@1;

SPIR BY FES_26;

SPIR BY FES_27;

SPIR BY FES_28;

SPIR BY FES_29;

SPIR BY FES_30;

SOCIO BY

FES_31@1;

SOCIO BY FES_32;

SOCIO BY FES_33;

SOCIO BY FES_34;

SOCIO BY FES_35;

SOCIO BY FES_36;

OUTPUT:

MODINDICES(ALL);

SAMPSTAT;

STDYX;

SAVEDATA:

DIFFTEST = diff_gender_configural.dat;

## Model A2 – Metric

TITLE: FES Gender invariance – A2 Metric (WLSMV; THETA; DIFFTEST)

DATA:

FILE = FES-analysis-invariance.csv;

VARIABLE:

NAMES = Gender Age Educlev Rlgaff Ethnaff

FES_01-FES_42 REL_01-REL_12 NAT_01-NAT_32 AEQ_01-AEQ_22

DSES_01-DSES_16 Extr_01-Extr_08 Neurot_01-Neurot_08

Narcis_01-Narcis_09 NFCS-15_01-NFCS-15_15 Acc12 Acc14;

USEVARIABLES = Gender FES_01-FES_36;

CATEGORICAL = FES_01-FES_36;

MISSING = ALL(9999);

USEOBSERVATIONS = (Acc12 EQ 1);

GROUPING = Gender (0 = Male 1 = Female);

DEFINE:

! FES_05 has 6 categories in data (2–7). Shift to 1–6.

IF (FES_05 EQ 1) THEN FES_05 = 2;

FES_05 = FES_05 - 1;

ANALYSIS:

ESTIMATOR = WLSMV;

PARAMETERIZATION = THETA;

MODEL = CONFIGURAL; ! <- keeping identification as in A1

DIFFTEST = diff_gender_configural.dat;

MODEL:

! VISUAL

VISUAL BY FES_01@1;

VISUAL BY FES_02 (vi2);

VISUAL BY FES_03 (vi3);

VISUAL BY FES_04 (vi4);

VISUAL BY FES_05 (vi5);

VISUAL BY FES_06 (vi6);

! EMOT

EMOT BY FES_07@1;

EMOT BY FES_08 (em2);

EMOT BY FES_09 (em3);

EMOT BY FES_10 (em4);

EMOT BY FES_11 (em5);

EMOT BY FES_12 (em6);

! COGN

COGN BY FES_13@1;

COGN BY FES_14 (cg2);

COGN BY FES_15 (cg3);

COGN BY FES_16 (cg4);

COGN BY FES_17 (cg5);

COGN BY FES_18 (cg6);

! COMM

COMM BY FES_19@1;

COMM BY FES_20 (cm2);

COMM BY FES_21 (cm3);

COMM BY FES_22 (cm4);

COMM BY FES_23 (cm5);

COMM BY FES_24 (cm6);

! SPIR

SPIR BY FES_25@1;

SPIR BY FES_26 (sp2);

SPIR BY FES_27 (sp3);

SPIR BY FES_28 (sp4);

SPIR BY FES_29 (sp5);

SPIR BY FES_30 (sp6);

! SOCIO

SOCIO BY FES_31@1;

SOCIO BY FES_32 (so2);

SOCIO BY FES_33 (so3);

SOCIO BY FES_34 (so4);

SOCIO BY FES_35 (so5);

SOCIO BY FES_36 (so6);

OUTPUT:

MODINDICES;

SAMPSTAT;

STDYX;

TECH1 TECH4;

SAVEDATA:

DIFFTEST = diff_gender_metric.dat; ! <- used in A3

## Model A3 – Scalar

TITLE:

FES Gender invariance – A3 Scalar (WLSMV; THETA)

H0 vs A2 (A2 is H1; use diff_gender_metric.dat)

DATA:

FILE = FES-analysis-invariance.csv;

VARIABLE:

NAMES = Gender Age Educlev Rlgaff Ethnaff

FES_01-FES_42 REL_01-REL_12 NAT_01-NAT_32 AEQ_01-AEQ_22

DSES_01-DSES_16 Extr_01-Extr_08 Neurot_01-Neurot_08

Narcis_01-Narcis_09 NFCS-15_01-NFCS-15_15 Acc12 Acc14;

USEVARIABLES ARE FES_01-FES_36;

CATEGORICAL ARE FES_01-FES_36;

MISSING ARE ALL (9999);

USEOBSERVATIONS ARE (Acc12 EQ 1);

GROUPING IS Gender (0 = Male 1 = Female);

DEFINE:

! FES_05 ima 6 kategorija: pomeri opseg 2–7 -> 1–6

IF (FES_05 EQ 1) THEN FES_05 = 2;

FES_05 = FES_05 - 1;

ANALYSIS:

ESTIMATOR = WLSMV;

PARAMETERIZATION = THETA;

MODEL = CONFIGURAL;

DIFFTEST = diff_gender_metric.dat;

MODEL:

! =========================

! 1) LOADINGS (metric) – isti labels kao u A2

! =========================

! VISUAL

VISUAL BY FES_01@1;

VISUAL BY FES_02 (vi2);

VISUAL BY FES_03 (vi3);

VISUAL BY FES_04 (vi4);

VISUAL BY FES_05 (vi5);

VISUAL BY FES_06 (vi6);

! EMOT

EMOT BY FES_07@1;

EMOT BY FES_08 (em2);

EMOT BY FES_09 (em3);

EMOT BY FES_10 (em4);

EMOT BY FES_11 (em5);

EMOT BY FES_12 (em6);

! COGN

COGN BY FES_13@1;

COGN BY FES_14 (cg2);

COGN BY FES_15 (cg3);

COGN BY FES_16 (cg4);

COGN BY FES_17 (cg5);

COGN BY FES_18 (cg6);

! COMM

COMM BY FES_19@1;

COMM BY FES_20 (cm2);

COMM BY FES_21 (cm3);

COMM BY FES_22 (cm4);

COMM BY FES_23 (cm5);

COMM BY FES_24 (cm6);

! SPIR

SPIR BY FES_25@1;

SPIR BY FES_26 (sp2);

SPIR BY FES_27 (sp3);

SPIR BY FES_28 (sp4);

SPIR BY FES_29 (sp5);

SPIR BY FES_30 (sp6);

! SOCIO

SOCIO BY FES_31@1;

SOCIO BY FES_32 (so2);

SOCIO BY FES_33 (so3);

SOCIO BY FES_34 (so4);

SOCIO BY FES_35 (so5);

SOCIO BY FES_36 (so6);

! =========================

! 2) THRESHOLDS – jednaki preko grupa (scalar za ordinalne)

! =========================

[FES_01$1] (t0101);

[FES_01$2] (t0102);

[FES_01$3] (t0103);

[FES_01$4] (t0104);

[FES_01$5] (t0105);

[FES_01$6] (t0106);

[FES_02$1] (t0201);

[FES_02$2] (t0202);

[FES_02$3] (t0203);

[FES_02$4] (t0204);

[FES_02$5] (t0205);

[FES_02$6] (t0206);

[FES_03$1] (t0301);

[FES_03$2] (t0302);

[FES_03$3] (t0303);

[FES_03$4] (t0304);

[FES_03$5] (t0305);

[FES_03$6] (t0306);

[FES_04$1] (t0401);

[FES_04$2] (t0402);

[FES_04$3] (t0403);

[FES_04$4] (t0404);

[FES_04$5] (t0405);

[FES_04$6] (t0406);

! FES_05 ima 6 kategorija -> 5 pragova

[FES_05$1] (t0501);

[FES_05$2] (t0502);

[FES_05$3] (t0503);

[FES_05$4] (t0504);

[FES_05$5] (t0505);

[FES_06$1] (t0601);

[FES_06$2] (t0602);

[FES_06$3] (t0603);

[FES_06$4] (t0604);

[FES_06$5] (t0605);

[FES_06$6] (t0606);

[FES_07$1] (t0701);

[FES_07$2] (t0702);

[FES_07$3] (t0703);

[FES_07$4] (t0704);

[FES_07$5] (t0705);

[FES_07$6] (t0706);

[FES_08$1] (t0801);

[FES_08$2] (t0802);

[FES_08$3] (t0803);

[FES_08$4] (t0804);

[FES_08$5] (t0805);

[FES_08$6] (t0806);

[FES_09$1] (t0901);

[FES_09$2] (t0902);

[FES_09$3] (t0903);

[FES_09$4] (t0904);

[FES_09$5] (t0905);

[FES_09$6] (t0906);

[FES_10$1] (t1001);

[FES_10$2] (t1002);

[FES_10$3] (t1003);

[FES_10$4] (t1004);

[FES_10$5] (t1005);

[FES_10$6] (t1006);

[FES_11$1] (t1101);

[FES_11$2] (t1102);

[FES_11$3] (t1103);

[FES_11$4] (t1104);

[FES_11$5] (t1105);

[FES_11$6] (t1106);

[FES_12$1] (t1201);

[FES_12$2] (t1202);

[FES_12$3] (t1203);

[FES_12$4] (t1204);

[FES_12$5] (t1205);

[FES_12$6] (t1206);

[FES_13$1] (t1301);

[FES_13$2] (t1302);

[FES_13$3] (t1303);

[FES_13$4] (t1304);

[FES_13$5] (t1305);

[FES_13$6] (t1306);

[FES_14$1] (t1401);

[FES_14$2] (t1402);

[FES_14$3] (t1403);

[FES_14$4] (t1404);

[FES_14$5] (t1405);

[FES_14$6] (t1406);

[FES_15$1] (t1501);

[FES_15$2] (t1502);

[FES_15$3] (t1503);

[FES_15$4] (t1504);

[FES_15$5] (t1505);

[FES_15$6] (t1506);

[FES_16$1] (t1601);

[FES_16$2] (t1602);

[FES_16$3] (t1603);

[FES_16$4] (t1604);

[FES_16$5] (t1605);

[FES_16$6] (t1606);

[FES_17$1] (t1701);

[FES_17$2] (t1702);

[FES_17$3] (t1703);

[FES_17$4] (t1704);

[FES_17$5] (t1705);

[FES_17$6] (t1706);

[FES_18$1] (t1801);

[FES_18$2] (t1802);

[FES_18$3] (t1803);

[FES_18$4] (t1804);

[FES_18$5] (t1805);

[FES_18$6] (t1806);

[FES_19$1] (t1901);

[FES_19$2] (t1902);

[FES_19$3] (t1903);

[FES_19$4] (t1904);

[FES_19$5] (t1905);

[FES_19$6] (t1906);

[FES_20$1] (t2001);

[FES_20$2] (t2002);

[FES_20$3] (t2003);

[FES_20$4] (t2004);

[FES_20$5] (t2005);

[FES_20$6] (t2006);

[FES_21$1] (t2101);

[FES_21$2] (t2102);

[FES_21$3] (t2103);

[FES_21$4] (t2104);

[FES_21$5] (t2105);

[FES_21$6] (t2106);

[FES_22$1] (t2201);

[FES_22$2] (t2202);

[FES_22$3] (t2203);

[FES_22$4] (t2204);

[FES_22$5] (t2205);

[FES_22$6] (t2206);

[FES_23$1] (t2301);

[FES_23$2] (t2302);

[FES_23$3] (t2303);

[FES_23$4] (t2304);

[FES_23$5] (t2305);

[FES_23$6] (t2306);

[FES_24$1] (t2401);

[FES_24$2] (t2402);

[FES_24$3] (t2403);

[FES_24$4] (t2404);

[FES_24$5] (t2405);

[FES_24$6] (t2406);

[FES_25$1] (t2501);

[FES_25$2] (t2502);

[FES_25$3] (t2503);

[FES_25$4] (t2504);

[FES_25$5] (t2505);

[FES_25$6] (t2506);

[FES_26$1] (t2601);

[FES_26$2] (t2602);

[FES_26$3] (t2603);

[FES_26$4] (t2604);

[FES_26$5] (t2605);

[FES_26$6] (t2606);

[FES_27$1] (t2701);

[FES_27$2] (t2702);

[FES_27$3] (t2703);

[FES_27$4] (t2704);

[FES_27$5] (t2705);

[FES_27$6] (t2706);

[FES_28$1] (t2801);

[FES_28$2] (t2802);

[FES_28$3] (t2803);

[FES_28$4] (t2804);

[FES_28$5] (t2805);

[FES_28$6] (t2806);

[FES_29$1] (t2901);

[FES_29$2] (t2902);

[FES_29$3] (t2903);

[FES_29$4] (t2904);

[FES_29$5] (t2905);

[FES_29$6] (t2906);

[FES_30$1] (t3001);

[FES_30$2] (t3002);

[FES_30$3] (t3003);

[FES_30$4] (t3004);

[FES_30$5] (t3005);

[FES_30$6] (t3006);

[FES_31$1] (t3101);

[FES_31$2] (t3102);

[FES_31$3] (t3103);

[FES_31$4] (t3104);

[FES_31$5] (t3105);

[FES_31$6] (t3106);

[FES_32$1] (t3201);

[FES_32$2] (t3202);

[FES_32$3] (t3203);

[FES_32$4] (t3204);

[FES_32$5] (t3205);

[FES_32$6] (t3206);

[FES_33$1] (t3301);

[FES_33$2] (t3302);

[FES_33$3] (t3303);

[FES_33$4] (t3304);

[FES_33$5] (t3305);

[FES_33$6] (t3306);

[FES_34$1] (t3401);

[FES_34$2] (t3402);

[FES_34$3] (t3403);

[FES_34$4] (t3404);

[FES_34$5] (t3405);

[FES_34$6] (t3406);

[FES_35$1] (t3501);

[FES_35$2] (t3502);

[FES_35$3] (t3503);

[FES_35$4] (t3504);

[FES_35$5] (t3505);

[FES_35$6] (t3506);

[FES_36$1] (t3601);

[FES_36$2] (t3602);

[FES_36$3] (t3603);

[FES_36$4] (t3604);

[FES_36$5] (t3605);

[FES_36$6] (t3606);

OUTPUT:

MODINDICES(ALL);

SAMPSTAT;

STDYX;

## Religious Affiliation Model A1 – Configural

TITLE:

FES Religious Affiliation invariance – A1 Configural (WLSMV; THETA; DIFFTEST save)

DATA:

FILE = FES-analysis-Religiosity.csv;

VARIABLE:

NAMES = Gender Age Educlev Rlgaff Ethnaff

FES_01-FES_42 REL_01-REL_12 NAT_01-NAT_32 AEQ_01-AEQ_22

DSES_01-DSES_16 Extr_01-Extr_08 Neurot_01-Neurot_08

Narcis_01-Narcis_09 NFCS-15_01-NFCS-15_15 Acc12 Acc14 RelgBin;

USEVARIABLES ARE FES_01-FES_36;

CATEGORICAL ARE FES_01-FES_36;

MISSING ARE ALL (9999);

USEOBSERVATIONS ARE (Acc12 EQ 1);

GROUPING IS RelgBin (0 = nonOrthodox 1 = Orthodox);

DEFINE:

! FES_05 ima 6 kategorija: pomeri opseg 2–7 -> 1–6

IF (FES_05 EQ 1) THEN FES_05 = 2;

FES_05 = FES_05 - 1;

ANALYSIS:

ESTIMATOR = WLSMV;

PARAMETERIZATION = DELTA;

MODEL = CONFIGURAL;

MODEL:

! Marker opterecenje @1 za prvi indikator svakog faktora

VISUAL BY

FES_01@1;

VISUAL BY FES_02;

VISUAL BY FES_03;

VISUAL BY FES_04;

VISUAL BY FES_05;

VISUAL BY FES_06;

EMOT BY

FES_07@1;

EMOT BY FES_08;

EMOT BY FES_09;

EMOT BY FES_10;

EMOT BY FES_11;

EMOT BY FES_12;

COGN BY

FES_13@1;

COGN BY FES_14;

COGN BY FES_15;

COGN BY FES_16;

COGN BY FES_17;

COGN BY FES_18;

COMM BY

FES_19@1;

COMM BY FES_20;

COMM BY FES_21;

COMM BY FES_22;

COMM BY FES_23;

COMM BY FES_24;

SPIR BY

FES_25@1;

SPIR BY FES_26;

SPIR BY FES_27;

SPIR BY FES_28;

SPIR BY FES_29;

SPIR BY FES_30;

SOCIO BY

FES_31@1;

SOCIO BY FES_32;

SOCIO BY FES_33;

SOCIO BY FES_34;

SOCIO BY FES_35;

SOCIO BY FES_36;

OUTPUT:

MODINDICES;

SAMPSTAT;

STDYX;

SAVEDATA:

DIFFTEST = diff_Religiosity_configural.dat;

## Model A2 – Metric partial

TITLE: FES Religiosity invariance – A2 Metric - parcijalno (WLSMV; DELTA; DIFFTEST, Model 4)

DATA:

FILE = FES-analysis-Religiosity.csv;

VARIABLE:

NAMES = Gender Age Educlev Rlgaff Ethnaff

FES_01-FES_42 REL_01-REL_12 NAT_01-NAT_32 AEQ_01-AEQ_22

DSES_01-DSES_16 Extr_01-Extr_08 Neurot_01-Neurot_08

Narcis_01-Narcis_09 NFCS-15_01-NFCS-15_15 Acc12 Acc14 RelgBin;

USEVARIABLES ARE FES_01-FES_36;

CATEGORICAL ARE FES_01-FES_36;

MISSING ARE ALL (9999);

USEOBSERVATIONS ARE (Acc12 EQ 1);

GROUPING IS RelgBin (0 = nonOrthodox 1 = Orthodox);

DEFINE:

! FES_05 has 6 categories in your data (2–7). Shift to 1–6.

IF (FES_05 EQ 1) THEN FES_05 = 2;

FES_05 = FES_05 - 1;

ANALYSIS:

ESTIMATOR = WLSMV;

PARAMETERIZATION = DELTA;

MODEL = CONFIGURAL; ! <- drži identifikaciju kao u A1

DIFFTEST = diff_Religiosity_configural.dat;

MODEL:

! VISUAL

VISUAL BY FES_01@1;

VISUAL BY FES_02 (vi2);

VISUAL BY FES_03 (vi3);

VISUAL BY FES_04 (vi4);

VISUAL BY FES_05 (vi5);

VISUAL BY FES_06 (vi6);

! EMOT

EMOT BY FES_07@1;

EMOT BY FES_08 (em2);

EMOT BY FES_09 (em3);

EMOT BY FES_10 (em4);

EMOT BY FES_11 (em5);

EMOT BY FES_12 (em6);

! COGN

COGN BY FES_13@1;

COGN BY FES_14 (cg2);

COGN BY FES_15 (cg3);

COGN BY FES_16 (cg4);

COGN BY FES_17 (cg5);

COGN BY FES_18 (cg6);

! COMM

COMM BY FES_19@1;

COMM BY FES_20 (cm2);

COMM BY FES_21 (cm3);

COMM BY FES_22 (cm4);

COMM BY FES_23 (cm5);

COMM BY FES_24 (cm6);

! SPIR

SPIR BY FES_25@1;

SPIR BY FES_26 (sp2);

SPIR BY FES_27 (sp3);

SPIR BY FES_28 (sp4);

SPIR BY FES_29 (sp5);

SPIR BY FES_30 (sp6);

! SOCIO

SOCIO BY FES_31@1;

SOCIO BY FES_32 (so2);

SOCIO BY FES_33 (so3);

SOCIO BY FES_34 (so4);

SOCIO BY FES_35 (so5);

SOCIO BY FES_36 (so6);

MODEL Orthodox:

! Oslobadamo najproblematicnija opterecenja (nove etikete => nisu više jednaka)

COGN BY FES_18 (cg6_o);

COMM BY FES_24 (cm6_o);

SPIR BY FES_30 (sp6_o);

EMOT BY FES_09 (em3_o);

COMM BY FES_23 (cm5_o);

VISUAL BY FES_05 (vi5_o);

SOCIO BY FES_35 (so5_o);

SOCIO BY FES_32 (so2_o);

EMOT BY FES_08 (em2_o);

EMOT BY FES_10 (em4_o);

OUTPUT:

MODINDICES;

SAMPSTAT;

STDYX;

TECH1 TECH4;

SAVEDATA: DIFFTEST = diff_Religiosity_metric_partial.dat;

## Model A3 - Scalar

TITLE:

Religiosity invariance (RelgBin): A3 Scalar PARTIAL vs A2 Model 4 (H1); WLSMV DELTA

DATA:

FILE = FES-analysis-Religiosity.csv;

VARIABLE:

NAMES = Gender Age Educlev Rlgaff Ethnaff

FES_01-FES_42 REL_01-REL_12 NAT_01-NAT_32 AEQ_01-AEQ_22

DSES_01-DSES_16 Extr_01-Extr_08 Neurot_01-Neurot_08

Narcis_01-Narcis_09 NFCS-15_01-NFCS-15_15 Acc12 Acc14 RelgBin;

USEVARIABLES ARE FES_01-FES_36;

CATEGORICAL ARE FES_01-FES_36;

MISSING ARE ALL (9999);

USEOBSERVATIONS ARE (Acc12 EQ 1);

GROUPING IS RelgBin (0 = nonOrthodox 1 = Orthodox);

DEFINE:

! Ako FES_05 u sirovim podacima ide 2–7 pa je pomeraš na 1–6:

IF (FES_05 EQ 1) THEN FES_05 = 2;

FES_05 = FES_05 - 1;

ANALYSIS:

ESTIMATOR = WLSMV;

PARAMETERIZATION = DELTA;

MODEL = CONFIGURAL;

DIFFTEST = diff_Religiosity_metric_partial.dat; ! <-- PROMENI na tvoj A2_H1 DIFFTEST fajl

MODEL:

! =============================

! A2 Model 4: metric (loadings equal by labels)

! =============================

! VISUAL

VISUAL BY FES_01@1;

VISUAL BY FES_02 (vi2);

VISUAL BY FES_03 (vi3);

VISUAL BY FES_04 (vi4);

VISUAL BY FES_05 (vi5);

VISUAL BY FES_06 (vi6);

! EMOT

EMOT BY FES_07@1;

EMOT BY FES_08 (em2);

EMOT BY FES_09 (em3);

EMOT BY FES_10 (em4);

EMOT BY FES_11 (em5);

EMOT BY FES_12 (em6);

! COGN

COGN BY FES_13@1;

COGN BY FES_14 (cg2);

COGN BY FES_15 (cg3);

COGN BY FES_16 (cg4);

COGN BY FES_17 (cg5);

COGN BY FES_18 (cg6);

! COMM

COMM BY FES_19@1;

COMM BY FES_20 (cm2);

COMM BY FES_21 (cm3);

COMM BY FES_22 (cm4);

COMM BY FES_23 (cm5);

COMM BY FES_24 (cm6);

! SPIR

SPIR BY FES_25@1;

SPIR BY FES_26 (sp2);

SPIR BY FES_27 (sp3);

SPIR BY FES_28 (sp4);

SPIR BY FES_29 (sp5);

SPIR BY FES_30 (sp6);

! SOCIO

SOCIO BY FES_31@1;

SOCIO BY FES_32 (so2);

SOCIO BY FES_33 (so3);

SOCIO BY FES_34 (so4);

SOCIO BY FES_35 (so5);

SOCIO BY FES_36 (so6);

! =============================

! FULL SCALAR: thresholds equal across groups

! =============================

[FES_01$1] (t0101);

[FES_01$2] (t0102);

[FES_01$3] (t0103);

[FES_01$4] (t0104);

[FES_01$5] (t0105);

[FES_01$6] (t0106);

[FES_02$1] (t0201);

[FES_02$2] (t0202);

[FES_02$3] (t0203);

[FES_02$4] (t0204);

[FES_02$5] (t0205);

[FES_02$6] (t0206);

[FES_03$1] (t0301);

[FES_03$2] (t0302);

[FES_03$3] (t0303);

[FES_03$4] (t0304);

[FES_03$5] (t0305);

[FES_03$6] (t0306);

[FES_04$1] (t0401);

[FES_04$2] (t0402);

[FES_04$3] (t0403);

[FES_04$4] (t0404);

[FES_04$5] (t0405);

[FES_04$6] (t0406);

[FES_05$1] (t0501);

[FES_05$2] (t0502);

[FES_05$3] (t0503);

[FES_05$4] (t0504);

[FES_05$5] (t0505);

[FES_06$1] (t0601);

[FES_06$2] (t0602);

[FES_06$3] (t0603);

[FES_06$4] (t0604);

[FES_06$5] (t0605);

[FES_06$6] (t0606);

[FES_07$1] (t0701);

[FES_07$2] (t0702);

[FES_07$3] (t0703);

[FES_07$4] (t0704);

[FES_07$5] (t0705);

[FES_07$6] (t0706);

[FES_08$1] (t0801);

[FES_08$2] (t0802);

[FES_08$3] (t0803);

[FES_08$4] (t0804);

[FES_08$5] (t0805);

[FES_08$6] (t0806);

[FES_09$1] (t0901);

[FES_09$2] (t0902);

[FES_09$3] (t0903);

[FES_09$4] (t0904);

[FES_09$5] (t0905);

[FES_09$6] (t0906);

[FES_10$1] (t1001);

[FES_10$2] (t1002);

[FES_10$3] (t1003);

[FES_10$4] (t1004);

[FES_10$5] (t1005);

[FES_10$6] (t1006);

[FES_11$1] (t1101);

[FES_11$2] (t1102);

[FES_11$3] (t1103);

[FES_11$4] (t1104);

[FES_11$5] (t1105);

[FES_11$6] (t1106);

[FES_12$1] (t1201);

[FES_12$2] (t1202);

[FES_12$3] (t1203);

[FES_12$4] (t1204);

[FES_12$5] (t1205);

[FES_12$6] (t1206);

[FES_13$1] (t1301);

[FES_13$2] (t1302);

[FES_13$3] (t1303);

[FES_13$4] (t1304);

[FES_13$5] (t1305);

[FES_13$6] (t1306);

[FES_14$1] (t1401);

[FES_14$2] (t1402);

[FES_14$3] (t1403);

[FES_14$4] (t1404);

[FES_14$5] (t1405);

[FES_14$6] (t1406);

[FES_15$1] (t1501);

[FES_15$2] (t1502);

[FES_15$3] (t1503);

[FES_15$4] (t1504);

[FES_15$5] (t1505);

[FES_15$6] (t1506);

[FES_16$1] (t1601);

[FES_16$2] (t1602);

[FES_16$3] (t1603);

[FES_16$4] (t1604);

[FES_16$5] (t1605);

[FES_16$6] (t1606);

[FES_17$1] (t1701);

[FES_17$2] (t1702);

[FES_17$3] (t1703);

[FES_17$4] (t1704);

[FES_17$5] (t1705);

[FES_17$6] (t1706);

[FES_18$1] (t1801);

[FES_18$2] (t1802);

[FES_18$3] (t1803);

[FES_18$4] (t1804);

[FES_18$5] (t1805);

[FES_18$6] (t1806);

[FES_19$1] (t1901);

[FES_19$2] (t1902);

[FES_19$3] (t1903);

[FES_19$4] (t1904);

[FES_19$5] (t1905);

[FES_19$6] (t1906);

[FES_20$1] (t2001);

[FES_20$2] (t2002);

[FES_20$3] (t2003);

[FES_20$4] (t2004);

[FES_20$5] (t2005);

[FES_20$6] (t2006);

[FES_21$1] (t2101);

[FES_21$2] (t2102);

[FES_21$3] (t2103);

[FES_21$4] (t2104);

[FES_21$5] (t2105);

[FES_21$6] (t2106);

[FES_22$1] (t2201);

[FES_22$2] (t2202);

[FES_22$3] (t2203);

[FES_22$4] (t2204);

[FES_22$5] (t2205);

[FES_22$6] (t2206);

[FES_23$1] (t2301);

[FES_23$2] (t2302);

[FES_23$3] (t2303);

[FES_23$4] (t2304);

[FES_23$5] (t2305);

[FES_23$6] (t2306);

[FES_24$1] (t2401);

[FES_24$2] (t2402);

[FES_24$3] (t2403);

[FES_24$4] (t2404);

[FES_24$5] (t2405);

[FES_24$6] (t2406);

[FES_25$1] (t2501);

[FES_25$2] (t2502);

[FES_25$3] (t2503);

[FES_25$4] (t2504);

[FES_25$5] (t2505);

[FES_25$6] (t2506);

[FES_26$1] (t2601);

[FES_26$2] (t2602);

[FES_26$3] (t2603);

[FES_26$4] (t2604);

[FES_26$5] (t2605);

[FES_26$6] (t2606);

[FES_27$1] (t2701);

[FES_27$2] (t2702);

[FES_27$3] (t2703);

[FES_27$4] (t2704);

[FES_27$5] (t2705);

[FES_27$6] (t2706);

[FES_28$1] (t2801);

[FES_28$2] (t2802);

[FES_28$3] (t2803);

[FES_28$4] (t2804);

[FES_28$5] (t2805);

[FES_28$6] (t2806);

[FES_29$1] (t2901);

[FES_29$2] (t2902);

[FES_29$3] (t2903);

[FES_29$4] (t2904);

[FES_29$5] (t2905);

[FES_29$6] (t2906);

[FES_30$1] (t3001);

[FES_30$2] (t3002);

[FES_30$3] (t3003);

[FES_30$4] (t3004);

[FES_30$5] (t3005);

[FES_30$6] (t3006);

[FES_31$1] (t3101);

[FES_31$2] (t3102);

[FES_31$3] (t3103);

[FES_31$4] (t3104);

[FES_31$5] (t3105);

[FES_31$6] (t3106);

[FES_32$1] (t3201);

[FES_32$2] (t3202);

[FES_32$3] (t3203);

[FES_32$4] (t3204);

[FES_32$5] (t3205);

[FES_32$6] (t3206);

[FES_33$1] (t3301);

[FES_33$2] (t3302);

[FES_33$3] (t3303);

[FES_33$4] (t3304);

[FES_33$5] (t3305);

[FES_33$6] (t3306);

[FES_34$1] (t3401);

[FES_34$2] (t3402);

[FES_34$3] (t3403);

[FES_34$4] (t3404);

[FES_34$5] (t3405);

[FES_34$6] (t3406);

[FES_35$1] (t3501);

[FES_35$2] (t3502);

[FES_35$3] (t3503);

[FES_35$4] (t3504);

[FES_35$5] (t3505);

[FES_35$6] (t3506);

[FES_36$1] (t3601);

[FES_36$2] (t3602);

[FES_36$3] (t3603);

[FES_36$4] (t3604);

[FES_36$5] (t3605);

[FES_36$6] (t3606);

MODEL Orthodox:

! =============================

! Model 4: parcijalni metric (loadings freed in Orthodox)

! =============================

COGN BY FES_18 (cg6_o);

COMM BY FES_24 (cm6_o);

SPIR BY FES_30 (sp6_o);

EMOT BY FES_09 (em3_o);

COMM BY FES_23 (cm5_o);

SOCIO BY FES_35 (so5_o);

SOCIO BY FES_32 (so2_o);

EMOT BY FES_08 (em2_o);

EMOT BY FES_10 (em4_o);

! =============================

! PARCIJALNI SCALAR: otpusti pragove za iste ajteme

! (override global labels -> different labels => thresholds free in Orthodox)

! =============================

! ---- FES_08 ----

[FES_08$1] (t0801_o);

[FES_08$2] (t0802_o);

[FES_08$3] (t0803_o);

[FES_08$4] (t0804_o);

[FES_08$5] (t0805_o);

[FES_08$6] (t0806_o);

! ---- FES_09 ----

[FES_09$1] (t0901_o);

[FES_09$2] (t0902_o);

[FES_09$3] (t0903_o);

[FES_09$4] (t0904_o);

[FES_09$5] (t0905_o);

[FES_09$6] (t0906_o);

! ---- FES_10 ----

[FES_10$1] (t1001_o);

[FES_10$2] (t1002_o);

[FES_10$3] (t1003_o);

[FES_10$4] (t1004_o);

[FES_10$5] (t1005_o);

[FES_10$6] (t1006_o);

! ---- FES_18 ----

[FES_18$1] (t1801_o);

[FES_18$2] (t1802_o);

[FES_18$3] (t1803_o);

[FES_18$4] (t1804_o);

[FES_18$5] (t1805_o);

[FES_18$6] (t1806_o);

! ---- FES_23 ----

[FES_23$1] (t2301_o);

[FES_23$2] (t2302_o);

[FES_23$3] (t2303_o);

[FES_23$4] (t2304_o);

[FES_23$5] (t2305_o);

[FES_23$6] (t2306_o);

! ---- FES_24 ----

[FES_24$1] (t2401_o);

[FES_24$2] (t2402_o);

[FES_24$3] (t2403_o);

[FES_24$4] (t2404_o);

[FES_24$5] (t2405_o);

[FES_24$6] (t2406_o);

! ---- FES_30 ----

[FES_30$1] (t3001_o);

[FES_30$2] (t3002_o);

[FES_30$3] (t3003_o);

[FES_30$4] (t3004_o);

[FES_30$5] (t3005_o);

[FES_30$6] (t3006_o);

! ---- FES_32 ----

[FES_32$1] (t3201_o);

[FES_32$2] (t3202_o);

[FES_32$3] (t3203_o);

[FES_32$4] (t3204_o);

[FES_32$5] (t3205_o);

[FES_32$6] (t3206_o);

! ---- FES_35 ----

[FES_35$1] (t3501_o);

[FES_35$2] (t3502_o);

[FES_35$3] (t3503_o);

[FES_35$4] (t3504_o);

[FES_35$5] (t3505_o);

[FES_35$6] (t3506_o);

OUTPUT:

SAMPSTAT;

STDYX;

MODINDICES;

TECH1 TECH4;

# Appendix S8. R syntax / outputs summary (robustness check).

# ================================

> # 0) Packages: install & load

> # ================================

> req_pkgs <- c("tidyverse","readr","readxl","lavaan","semTools","psych")

> new_pkgs <- req_pkgs[!(req_pkgs %in% installed.packages()[,"Package"])]

> if(length(new_pkgs)) install.packages(new_pkgs, dependencies = TRUE)

>

> library(tidyverse)

> library(readr)

> library(readxl)

> library(lavaan)

> library(semTools)

> library(psych)

>

> # ================================

> # 1) Data import

> # ================================

> # --- Option A: CSV

> dat <- read_csv("C:/Users/HP/Downloads/R/2026-01-19-FES_36.csv")

**Rows:** 778 **Columns:** 173

── **Column specification** ─────────────────────────────────────────────────────────────────────────────────────────────────

**Delimiter:** ","

chr (1): UniqueID

dbl (172): Gender, Age, Educationlevel, Religiousaffiliation, Ethnicaffiliation, FES_01, FES_02, FES_03, FES_04, FES_...

ℹ Use `spec()` to retrieve the full column specification for this data.

ℹ Specify the column types or set `show_col_types = FALSE` to quiet this message.

>

> dat_ret <- dat

>

> # ================================

> # 2) Item map (FES core)

> # ================================

> Visual_items <- sprintf("FES_%02d", 1:6)

> Emot_items <- sprintf("FES_%02d", 7:12)

> Cogn_items <- sprintf("FES_%02d", 13:18)

> Comm_items <- sprintf("FES_%02d", 19:24)

> Spir_items <- sprintf("FES_%02d", 25:30)

> Socio_items <- sprintf("FES_%02d", 31:36)

>

> fes36 <- c(Visual_items, Emot_items, Cogn_items, Comm_items, Spir_items, Socio_items)

>

> # ================================

> # 3) CFA (WLSMV; ordinal 1–7)

> # ================================

> ordered_items <- fes36

>

> model6 <- '

+ Visual =~ FES_01 + FES_02 + FES_03 + FES_04 + FES_05 + FES_06

+ Emot =~ FES_07 + FES_08 + FES_09 + FES_10 + FES_11 + FES_12

+ Cogn =~ FES_13 + FES_14 + FES_15 + FES_16 + FES_17 + FES_18

+ Comm =~ FES_19 + FES_20 + FES_21 + FES_22 + FES_23 + FES_24

+ Spir =~ FES_25 + FES_26 + FES_27 + FES_28 + FES_29 + FES_30

+ Socio =~ FES_31 + FES_32 + FES_33 + FES_34 + FES_35 + FES_36

+ '

>

> fit6 <- cfa(model6, data = dat_ret, ordered = ordered_items,

+ estimator = "WLSMV", parameterization = "theta")

>

> # Fit indices

> fit_meas <- fitMeasures(fit6, c("chisq","df","cfi","tli","rmsea","rmsea.ci.lower","rmsea.ci.upper","srmr"))

> print(round(fit_meas, 3))

chisq df cfi tli rmsea rmsea.ci.lower rmsea.ci.upper srmr

2929.885 579.000 0.993 0.992 0.072 0.070 0.075 0.057

>

> # STDYX loadings & latent correlations

> std <- standardizedSolution(fit6) # all standardised params

> loads <- std %>% filter(op == "=~") # factor loadings

> latent_with <- std %>% filter(op == "~~", lhs %in% c("Visual","Emot","Cogn","Comm","Spir","Socio"),

+ rhs %in% c("Visual","Emot","Cogn","Comm","Spir","Socio"), lhs != rhs)

>

> # Quick loading ranges per factor (λ min–max)

> loading_ranges <- loads %>%

+ group_by(lhs) %>%

+ summarise(lambda_min = min(est.std, na.rm=TRUE),

+ lambda_max = max(est.std, na.rm=TRUE), .groups="drop")

> print(loading_ranges)

# A tibble: 6 × 3

lhs lambda_min lambda_max

*<chr>* *<dbl>* *<dbl>*

1 Cogn 0.679 0.879

2 Comm 0.777 0.851

3 Emot 0.814 0.894

4 Socio 0.721 0.907

5 Spir 0.830 0.925

6 Visual 0.667 0.876

>

> # Interfactor correlation range (STDYX)

> latent_cor_range <- range(latent_with$est.std, na.rm = TRUE)

> print(latent_cor_range)

[1] 0.6300094 0.8939190

>

> # ================================

> # 4) Reliability: McDonald’s ω (from CFA)

> # ================================

> omega_out <- semTools::reliability(fit6) # semTools

> print(omega_out)

Visual Emot Cogn Comm Spir Socio

alpha 0.8767994 0.9368063 0.8817999 0.9028219 0.9538784 0.9120147

alpha.ord 0.8989828 0.9389755 0.8883241 0.9187725 0.9503935 0.9322526

omega 0.8910736 0.9289018 0.8793138 0.9051298 0.9418516 0.9100875

omega2 0.8910736 0.9289018 0.8793138 0.9051298 0.9418516 0.9100875

omega3 0.9393087 0.9410775 0.8983557 0.9343276 0.9557735 0.9160024

avevar 0.6769847 0.7411802 0.6231264 0.6801724 0.7994491 0.7486477

>

> # ================================

> # 5) Cronbach’s alpha per subscale (raw & polychoric)

> # ================================

> alpha_raw <- list(

+ Visual = psych::alpha(dat_ret[, Visual_items]),

+ Emot = psych::alpha(dat_ret[, Emot_items]),

+ Cogn = psych::alpha(dat_ret[, Cogn_items]),

+ Comm = psych::alpha(dat_ret[, Comm_items]),

+ Spir = psych::alpha(dat_ret[, Spir_items]),

+ Socio = psych::alpha(dat_ret[, Socio_items])

+ )

>

> # Polychoric alpha (recommended for ordinal items)

> poly_alpha <- function(items) {

+ pc <- psych::polychoric(dat_ret[, items])$rho

+ psych::alpha(pc, n.obs = nrow(dat_ret))

+ }

>

> alpha_poly <- list(

+ Visual = poly_alpha(Visual_items),

+ Emot = poly_alpha(Emot_items),

+ Cogn = poly_alpha(Cogn_items),

+ Comm = poly_alpha(Comm_items),

+ Spir = poly_alpha(Spir_items),

+ Socio = poly_alpha(Socio_items)

+ )

>

> # Summarise α results

> alpha_summary <- tibble(

+ Factor = names(alpha_raw),

+ Alpha_raw = sapply(alpha_raw, function(x) x$total$raw_alpha),

+ Alpha_std = sapply(alpha_raw, function(x) x$total$std.alpha),

+ Alpha_poly = sapply(alpha_poly, function(x) x$total$raw_alpha) # polihorička alfa

+ )

>

> # Prikaz sa zaokruživanjem samo numeričkih kolona:

> alpha_summary_rounded <- alpha_summary %>%

+ dplyr::mutate(dplyr::across(where(is.numeric), ~round(.x, 3)))

>

> print(alpha_summary_rounded)

# A tibble: 6 × 4

Factor Alpha_raw Alpha_std Alpha_poly

*<chr>* *<dbl>* *<dbl>* *<dbl>*

1 Visual 0.877 0.882 0.899

2 Emot 0.937 0.937 0.939

3 Cogn 0.882 0.881 0.888

4 Comm 0.903 0.907 0.919

5 Spir 0.954 0.954 0.95

6 Socio 0.912 0.913 0.932

>

> # ================================

> # 6) AVE & CR (from STDYX loadings)

> # ================================

> get_ave_cr <- function(fit, factor_name){

+ ss <- standardizedSolution(fit)

+ lambdas <- ss %>%

+ dplyr::filter(op == "=~", lhs == factor_name) %>%

+ dplyr::pull(est.std) %>%

+ unique()

+

+ # sigurnije zbog mogućih NA

+ lambdas <- lambdas[!is.na(lambdas)]

+

+ if (length(lambdas) == 0) {

+ stop(paste0("Nema standardizovanih ladenja za faktor: ", factor_name))

+ }

+

+ AVE <- mean(lambdas^2, na.rm = TRUE)

+

+ # Klasična CR aproksimacija iz ladenja:

+ CR <- (sum(lambdas))^2 / ((sum(lambdas))^2 + sum(1 - lambdas^2))

+

+ tibble(Factor = factor_name, AVE = AVE, CR = CR)

+ }

>

> ave_cr <- dplyr::bind_rows(

+ get_ave_cr(fit6,"Visual"),

+ get_ave_cr(fit6,"Emot"),

+ get_ave_cr(fit6,"Cogn"),

+ get_ave_cr(fit6,"Comm"),

+ get_ave_cr(fit6,"Spir"),

+ get_ave_cr(fit6,"Socio")

+ )

>

> # Zaokruži SAMO numeričke kolone

> ave_cr %>%

+ dplyr::mutate(dplyr::across(where(is.numeric), ~round(.x, 3))) %>%

+ print()

# A tibble: 6 × 3

Factor AVE CR

*<chr>* *<dbl>* *<dbl>*

1 Visual 0.636 0.912

2 Emot 0.732 0.943

3 Cogn 0.592 0.897

4 Comm 0.675 0.926

5 Spir 0.778 0.954

6 Socio 0.707 0.935

>

>

> # ================================

> # 7) Tidy exports (optional but handy)

> # ================================

> write_csv(as_tibble(loading_ranges), "FES_CFA_LoadingRanges.csv")

> write_csv(as_tibble(ave_cr), "FES_AVE_CR.csv")

> write_csv(as_tibble(alpha_summary), "FES_Alpha_Summary.csv")

>

> message("Done. Review CSVs in your working directory.")

Done. Review CSVs in your working directory.

# Supplementary Dataset

Excel file presenting correlations between all six FES dimensions and the external variables: Correlations.xlsx.
Datasets used for the Mplus analyses: FES-analysis.csv, FES-analysis-invariance.csv, FES-analysis-Religiosity.csv.

# References

Benet-Martínez, V., & John, O. P. (1998). Los Cinco Grandes across cultures and ethnic groups: Multitrait multimethod analyses of the Big Five in Spanish and English. Journal of Personality and Social Psychology, 75(3), 729–750. <https://doi.org/10.1037/0022-3514.75.3.729>

Čorkalo, D., & Kamenov, Ž. (1998). Nacionalni identitet i međunacionalna tolerancija [National identity and interethnic tolerance]. In Izvještaj s VIII. Ljetne psihologijske škole [Report from the VIII Summer School of Psychology] (pp. 89–94). Odsjek za psihologiju, Filozofski fakultet, Sveučilište u Zagrebu.

Dinić, B. M., Petrović, B., & Jonason, P. K. (2018). Serbian adaptations of the Dark Triad Dirty Dozen (DTDD) and Short Dark Triad (SD3). Personality and Individual Differences, 134, 321–328. <https://doi.org/10.1016/j.paid.2018.06.018>

Durkheim, É. (1995). The elementary forms of religious life (K. E. Fields, Trans.). Free Press. (Original work published 1912)

Galadza, P. (2018). Theology and form in Byzantine church architecture: The case of the Annunciation. Logos: A Journal of Eastern Christian Studies, 59(3–4), 335–362.

Gamsakhurdia, V., Goncalves, G., Hwang, K. K., Leman, P. J., Vauclair, C. M., & Yildirim, O. (2020). Believing, bonding, behaving, and belonging: The cognitive, emotional, moral, and social dimensions of religiousness across cultures. Journal of Cross-Cultural Psychology, 51(7–8), 551–575. <https://doi.org/10.1177/0022022120946488>

Geertz, C. (1973). The interpretation of cultures. Basic Books.

John, O. P., Donahue, E. M., & Kentle, R. L. (1991). The Big Five Inventory—Versions 4a and 54 [Technical report]. Institute of Personality and Social Research, University of California, Berkeley.

John, O. P., Naumann, L. P., & Soto, C. J. (2008). Paradigm shift to the integrative Big Five trait taxonomy: History, measurement, and conceptual issues. In O. P. John, R. W. Robins, & J. L. Pervin (Eds.), Handbook of personality: Theory and research (3rd ed., pp. 114–158). Guilford Press.

Kahneman, D. (2000). Evaluation by moments: Past and future. In D. Kahneman & A. Tversky (Eds.), Choices, values, and frames (pp. 693–708). Cambridge University Press.

Kamenov, Ž., Jelić, M., Huić, A., Franceško, M., & Mihić, V. (2006). Odnos nacionalnog i europskog identiteta i stavova prema europskim integracijama građana Zagreba i Novog Sada. Društvena istraživanja: Časopis za opća društvena pitanja, 15(4–5), 867–890. <https://hrcak.srce.hr/clanak/16724>

Meade, A. W., & Craig, S. B. (2012). Identifying careless responses in survey data. Psychological Methods, 17(3), 437–455. <https://doi.org/10.1037/a0028085>

Roets, A., & Van Hiel, A. (2011). Item selection and validation of a brief, 15-item version of the Need for Closure Scale. Personality and Individual Differences, 50(1), 90–94. <https://doi.org/10.1016/j.paid.2010.09.004>

Saroglou, V., Clobert, M., Cohen, A. B., Johnson, K. A., Ladd, K. L., Van Pachterbeke, M., Adamovova, L., Blogowska, J., Demmrich, S.,

Taves, A. (2009). Religious experience reconsidered: A building-block approach to the study of religion and other special things. Princeton University Press.

Žeželj, I., & Petrović, M. (2022). Need for Closure Scale (short form): Serbian translation [Unpublished instrument translation]. Department of Psychology, Faculty of Philosophy, University of Belgrade
